# Supplementary material for: Investigations of Oligonucleotide Usage Variance Within and Between Prokaryotes
Source: PLoS Comput Biol. 2008 Apr 18;4(4):e1000057. doi: 10.1371/journal.pcbi.1000057 (PMC2289840; doi:10.1371/journal.pcbi.1000057)
Supplement: Dataset S1 — Microsoft Excel file consisting of the data used to generate the results in the manuscript. Each column is labeled according to the abbreviations used in the text and additionally explained on a separate sheet. (0.17 MB DOC) [file pcbi.1000057.s001.xls]

## Sheet: Dataset
Name	Size	GC	OUD	OUD_O/OUD_E	OUV	OUV_O/OUV_E	GC content variance	Size ORFS	GC ORFS	OUD ORFS	OUD_O/OUD_E ORFS	OUV ORFS	OUV_O/OUV_E ORFS	GC content variance ORFS
Acidobacteria_bacterium_Ellin345_NC_008009.fna	5650000	0.583838	4.69e-07	2.13998	2.34e-06	0.316311	2.19161e-07	5050000	0.588845	2.72e-07	3.40014	2.86e-06	0.691181	7.99967e-08
Acinetobacter_sp_ADP1_NC_005966.fna	3600000	0.404296	4.01e-07	2.19071	1.96e-06	5.83629	1.83046e-07	3160000	0.415011	2.66e-07	2.94409	2.49e-06	3.42132	9.03505e-08
Aeropyrum_pernix_NC_000854.fna	1670000	0.563113	8.25e-07	1.60324	2.66e-06	1.57653	5.14583e-07	1550000	0.571286	5.64e-07	1.77896	3.07e-06	1.55842	3.17039e-07
Agrobacterium_tumefaciens_C58_UWash_NC_003304.fna	2840000	0.593752	2.69e-07	3.44033	3.48e-06	0.00614685	7.81902e-08	2500000	0.601548	1.88e-07	6.18529	4.12e-06	0.0696317	3.03947e-08
Agrobacterium_tumefaciens_C58_UWash_NC_003305.fna	2080000	0.592761	3.02e-07	3.30996	3.27e-06	0.00286908	9.12398e-08	1860000	0.598998	2.22e-07	4.84103	3.77e-06	0.0491306	4.5858e-08
Alcanivorax_borkumensis_SK2_NC_008260.fna	3120000	0.547278	7.28e-07	1.49087	1.56e-06	1.19281	4.88305e-07	2740000	0.552368	2.4e-07	2.88625	2.08e-06	0.073442	8.31529e-08
Anabaena_variabilis_ATCC_29413_NC_007413.fna	6370000	0.414214	2.2e-07	4.06288	1.19e-06	4.14526	5.41488e-08	5200000	0.425456	2.01e-07	3.79541	1.66e-06	5.10399	5.29587e-08
Anaeromyxobacter_dehalogenans_2CP-C_NC_007760.fna	5010000	0.749053	6.21e-07	2.464	6.68e-06	1.0916	2.52029e-07	4560000	0.748239	5.24e-07	2.39963	8.07e-06	1.13934	2.18367e-07
Anaplasma_marginale_St_Maries_NC_004842.fna	1200000	0.497627	5.18e-07	1.73619	9.52e-07	4182.92	2.98354e-07	1030000	0.497953	2.32e-07	3.1438	1.04e-06	117.431	7.3796e-08
Anaplasma_phagocytophilum_HZ_NC_007797.fna	1470000	0.416359	6.38e-07	1.4907	8.11e-07	2.81166	4.27987e-07	1000000	0.425635	2.79e-07	2.66631	9.9e-07	2.35512	1.04639e-07
Aquifex_aeolicus_NC_000918.fna	1550000	0.434762	3.09e-07	2.26702	4.19e-06	15.5535	1.36302e-07	1450000	0.436642	2.06e-07	2.96942	4.1e-06	28.8029	6.93738e-08
Archaeoglobus_fulgidus_NC_000917.fna	2180000	0.485817	3.23e-07	2.4416	2.55e-06	112.956	1.3229e-07	2020000	0.493584	2.17e-07	3.33909	2.93e-06	1.99421	6.49878e-08
Aster_yellows_witches-broom_phytoplasma_AYWB_NC_007716.fna	706566	0.268863	1.11e-06	1.46056	6.96e-06	6.47877	7.59982e-07	521085	0.285422	6.64e-07	1.30071	7.06e-06	10.8112	5.1049e-07
Azoarcus_sp_EbN1_NC_006513.fna	4300000	0.651215	6.12e-07	3.2356	4.56e-06	0.488225	1.89146e-07	3920000	0.654776	4.92e-07	3.63181	5.43e-06	0.639032	1.3547e-07
Bacillus_anthracis_Ames_0581_NC_007530.fna	5230000	0.353772	1.2e-06	1.37832	1.24e-06	3.17552	8.70625e-07	4220000	0.360421	3.18e-07	2.8918	1.92e-06	2.48153	1.09966e-07
Bacillus_anthracis_str_Sterne_NC_005945.fna	5230000	0.353794	1.2e-06	1.37797	1.24e-06	3.17351	8.70846e-07	4400000	0.360249	3.27e-07	2.75739	1.91e-06	2.50458	1.1859e-07
Bacillus_cereus_ATCC_10987_NC_003909.fna	5220000	0.355762	1.22e-06	1.38938	1.24e-06	3.32991	8.7809e-07	4450000	0.360735	3.44e-07	2.70349	1.91e-06	2.79899	1.27243e-07
Bacillus_cereus_ATCC14579_NC_004722.fna	5410000	0.352806	1.26e-06	1.37805	1.2e-06	3.17301	9.14335e-07	4370000	0.358898	3.59e-07	2.8267	1.85e-06	2.53005	1.27003e-07
Bacillus_cereus_ZK_NC_006274.fna	5300000	0.353519	1.21e-06	1.38631	1.23e-06	3.1922	8.72821e-07	4460000	0.359598	3.45e-07	2.77608	1.91e-06	2.52698	1.24276e-07
Bacillus_clausii_KSM-K16_NC_006582.fna	4300000	0.447533	6.05e-07	2.04037	2.32e-06	22.6911	2.96515e-07	3700000	0.453284	2.41e-07	3.50461	2.92e-06	83.5041	6.87666e-08
Bacillus_halodurans_NC_002570.fna	4200000	0.436855	6.42e-07	1.69988	1.68e-06	13.3679	3.77674e-07	3580000	0.443189	2.18e-07	3.21257	2.1e-06	27.1832	6.78584e-08
Bacillus_licheniformis_ATCC_14580_NC_006270.fna	4220000	0.461958	6.57e-07	1.9862	3.48e-06	65.6551	3.30782e-07	3630000	0.471838	2.73e-07	3.363	3.91e-06	86.7747	8.11775e-08
Bacillus_licheniformis_DSM_13_NC_006322.fna	4220000	0.461947	6.62e-07	1.98764	3.48e-06	65.4616	3.33058e-07	3680000	0.471533	2.78e-07	3.21944	3.91e-06	91.4438	8.63504e-08
Bacillus_subtilis_NC_000964.fna	4210000	0.435178	8.45e-07	1.61387	2.61e-06	18.5867	5.23586e-07	3680000	0.44254	4.36e-07	1.89133	3.04e-06	114.819	2.30526e-07
Bacillus_thuringiensis_konkukian_NC_005957.fna	5240000	0.354053	1.23e-06	1.3858	1.23e-06	3.21869	8.87574e-07	4400000	0.359976	3.45e-07	2.82084	1.91e-06	2.59542	1.22304e-07
Bacteroides_fragilis_NCTC_9434_NC_003228.fna	5210000	0.431906	7.8e-07	1.58688	1.27e-06	5.39942	4.91531e-07	4590000	0.442162	4.62e-07	1.93725	1.61e-06	6.5267	2.38482e-07
Bacteroides_fragilis_YCH46_NC_006347.fna	5280000	0.43266	7.91e-07	1.58622	1.26e-06	5.35003	4.9867e-07	4760000	0.442244	4.83e-07	1.86861	1.59e-06	7.30345	2.58481e-07
Bacteroides_thetaiotaomicron_VPI-5482_NC_004663.fna	6260000	0.428372	7.06e-07	1.79868	1.31e-06	3.33762	3.9251e-07	5610000	0.438843	4.1e-07	2.09661	1.73e-06	3.18071	1.95554e-07
Bartonella_henselae_Houston_1_NC_005956.fna	1930000	0.382303	9.22e-07	1.52103	2.67e-06	10.9733	6.06168e-07	1410000	0.400304	4.4e-07	2.1806	2.99e-06	5.99031	2.01779e-07
Bartonella_quintana_Toulouse_NC_005955.fna	1580000	0.387968	8.54e-07	1.44951	2.63e-06	10.4299	5.89165e-07	1140000	0.403994	3e-07	2.26431	2.99e-06	5.71935	1.32491e-07
Baumannia_cicadellinicola_Homalodisca_coagulata_NC_007984.fna	686191	0.332348	2.89e-07	2.19579	9.92e-07	1.36162	1.31616e-07	586770	0.343168	2.15e-07	2.52385	1.42e-06	1.03741	8.51873e-08
Bdellovibrio_bacteriovorus_NC_005363.fna	3780000	0.506455	4.31e-07	2.37327	2.63e-06	998.554	1.81606e-07	3520000	0.510089	2.33e-07	4.29534	3.3e-06	3.34393	5.42448e-08
Bifidobacterium_longum_NC_004307.fna	2260000	0.601198	4.47e-07	4.25708	2.2e-06	0.900513	1.05002e-07	1930000	0.608577	3.23e-07	3.28229	3.12e-06	1.33843	9.84069e-08
Bordetella_bronchiseptica_NC_002927.fna	5340000	0.68077	7.33e-07	2.37964	5.28e-06	0.70338	3.0803e-07	4910000	0.68486	5.05e-07	2.62697	6.72e-06	0.914093	1.92237e-07
Bordetella_parapertussis_NC_002928.fna	4770000	0.681	6.25e-07	2.45352	5.35e-06	0.709881	2.54736e-07	4130000	0.684306	3.87e-07	2.79952	6.74e-06	0.925694	1.38238e-07
Bordetella_pertussis_NC_002929.fna	4090000	0.677206	4.59e-07	3.04434	5.04e-06	0.754319	1.50772e-07	3380000	0.681259	2.8e-07	3.23431	6.5e-06	0.966555	8.65718e-08
Borrelia_afzelii_PKo_NC_008277.fna	905391	0.283111	2.08e-06	1.22969	3.86e-06	4.47384	1.69148e-06	849807	0.284772	4.28e-07	1.62802	4.15e-06	5.41284	2.62896e-07
Borrelia_burgdorferi_NC_001318.fna	910721	0.285933	2.11e-06	1.25195	4.09e-06	4.6785	1.68537e-06	853422	0.288212	4.19e-07	1.67091	4.35e-06	5.77143	2.50762e-07
Borrelia_garinii_PBi_NC_006156.fna	904243	0.283048	2.02e-06	1.25896	3.87e-06	4.5094	1.6045e-06	840879	0.285259	4.94e-07	1.59369	4.12e-06	5.48284	3.09972e-07
Bradyrhizobium_japonicum_NC_004463.fna	9110000	0.640594	4.71e-07	2.78784	4.24e-06	0.78164	1.68948e-07	7930000	0.646585	4.55e-07	2.97205	5.23e-06	0.951171	1.53093e-07
Brucella_abortus_9_941_NC_006932.fna	2120000	0.571558	3.54e-07	2.74977	3.37e-06	0.237426	1.28738e-07	1720000	0.582353	2.15e-07	4.37965	4.03e-06	0.00264614	4.90907e-08
Brucella_abortus_9_941_NC_006933.fna	1160000	0.573355	3.04e-07	2.87799	3.35e-06	0.232284	1.05629e-07	952620	0.582847	1.81e-07	5.31511	3.87e-06	0.00414126	3.40539e-08
Brucella_melitensis_biovar_Abortus_NC_007618.fna	2120000	0.57157	3.57e-07	2.7326	3.37e-06	0.237812	1.30645e-07	1710000	0.582612	2.18e-07	4.91011	4.03e-06	0.0019419	4.43982e-08
Brucella_melitensis_biovar_Abortus_NC_007624.fna	1160000	0.573408	3e-07	2.81334	3.35e-06	0.233004	1.06635e-07	938019	0.582998	1.66e-07	5.00493	3.89e-06	0.003138	3.31673e-08
Brucella_melitensis_NC_003317.fna	2120000	0.57158	3.62e-07	2.683	3.36e-06	0.429336	1.34924e-07	1820000	0.582753	2.27e-07	4.43491	3.96e-06	2.61e-05	5.11848e-08
Brucella_melitensis_NC_003318.fna	1180000	0.573379	3.02e-07	2.86587	3.35e-06	0.223406	1.05378e-07	1040000	0.582984	1.91e-07	5.67361	3.86e-06	0.00241514	3.36646e-08
Brucella_suis_1330_NC_004310.fna	2110000	0.57214	3.46e-07	2.55862	3.39e-06	0.241669	1.35229e-07	1780000	0.582043	2.24e-07	4.3439	4.02e-06	0.00901373	5.15666e-08
Brucella_suis_1330_NC_004311.fna	1210000	0.573164	3.09e-07	2.78038	3.31e-06	0.199747	1.11136e-07	1020000	0.582018	1.77e-07	5.47067	3.83e-06	0.00797472	3.23544e-08
Buchnera_aphidicola_NC_004545.fna	615977	0.253414	1.6e-06	1.28618	1.99e-06	3.00629	1.24399e-06	500034	0.27044	3.6e-07	1.62166	2.6e-06	2.61701	2.21995e-07
Buchnera_aphidicola_Sg_NC_004061.fna	641451	0.253306	9.16e-07	1.55393	4.66e-06	5.08089	5.89473e-07	535971	0.26302	3.44e-07	2.40289	4.87e-06	4.16942	1.43161e-07
Buchnera_sp_NC_002528.fna	640678	0.263125	6.59e-07	1.68897	3.61e-06	4.78391	3.90179e-07	557163	0.273997	2.74e-07	2.2862	3.92e-06	3.81282	1.1985e-07
Burkholderia_383_NC_007509.fna	1400000	0.652748	6.46e-07	2.55507	5.9e-06	0.743561	2.52831e-07	1200000	0.660604	4.92e-07	3.1028	7.1e-06	0.94953	1.58566e-07
Burkholderia_383_NC_007510.fna	3690000	0.662051	7.52e-07	2.57054	7.48e-06	0.649766	2.92546e-07	3240000	0.667814	5.24e-07	2.82596	9.18e-06	1.0251	1.85424e-07
Burkholderia_383_NC_007511.fna	3590000	0.667298	5.16e-07	2.72721	7.64e-06	0.784569	1.89204e-07	3150000	0.673326	3.09e-07	3.93786	9.19e-06	1.07451	7.8469e-08
Burkholderia_cenocepacia_AU_1054_NC_008060.fna	3290000	0.669357	7.49e-07	2.70714	8.34e-06	0.657536	2.76676e-07	2880000	0.67511	5.31e-07	3.0572	1.01e-05	1.00967	1.73688e-07
Burkholderia_cenocepacia_AU_1054_NC_008061.fna	2790000	0.668614	6.33e-07	2.44755	8.18e-06	0.768002	2.58626e-07	2410000	0.674738	4.92e-07	2.7319	9.79e-06	1.04663	1.80094e-07
Burkholderia_cenocepacia_AU_1054_NC_008062.fna	1200000	0.670447	4.38e-07	3.34099	8.23e-06	0.746657	1.31099e-07	1040000	0.676424	2.87e-07	4.28427	9.84e-06	1.02499	6.69892e-08
Burkholderia_mallei_ATCC_23344_NC_006348.fna	3510000	0.681542	6.58e-07	3.03748	1.11e-05	0.642473	2.16627e-07	2810000	0.683188	3.8e-07	3.66584	1.24e-05	0.959313	1.0366e-07
Burkholderia_mallei_ATCC_23344_NC_006349.fna	2330000	0.689856	6.81e-07	2.72987	1.21e-05	0.739527	2.49462e-07	1920000	0.691314	3.96e-07	3.56045	1.33e-05	0.915782	1.11222e-07
Burkholderia_pseudomallei_1710b_NC_007434.fna	4130000	0.67606	1.05e-06	2.68975	1.05e-05	0.602713	3.90371e-07	4260000	0.684455	6.63e-07	3.3701	1.22e-05	0.863166	1.9673e-07
Burkholderia_pseudomallei_1710b_NC_007435.fna	3180000	0.684608	1.11e-06	2.70925	1.13e-05	0.696716	4.09707e-07	3140000	0.69067	8.65e-07	3.52978	1.27e-05	0.891754	2.45058e-07
Burkholderia_pseudomallei_K96243_NC_006350.fna	4070000	0.677199	1.09e-06	2.73027	1.06e-05	0.578156	3.99228e-07	3390000	0.679891	8.18e-07	2.98284	1.21e-05	0.911544	2.74235e-07
Burkholderia_pseudomallei_K96243_NC_006351.fna	3170000	0.684938	1.1e-06	2.59994	1.15e-05	0.697899	4.23087e-07	2600000	0.688756	8.21e-07	3.00042	1.29e-05	0.950023	2.73628e-07
Burkholderia_thailandensis_E264_NC_007650.fna	2910000	0.68075	9.83e-07	2.71977	1.13e-05	0.705202	3.61428e-07	2540000	0.68495	7.42e-07	3.03372	1.25e-05	0.93092	2.44584e-07
Burkholderia_thailandensis_E264_NC_007651.fna	3810000	0.672862	9.22e-07	2.83836	1.03e-05	0.588723	3.24835e-07	3320000	0.677488	6.76e-07	3.30243	1.18e-05	0.905371	2.04698e-07
Burkholderia_xenovorans_LB400_NC_007951.fna	4900000	0.627559	6.11e-07	3.2953	4.7e-06	0.311336	1.85416e-07	4210000	0.633536	5.13e-07	3.82025	5.73e-06	0.599043	1.34284e-07
Burkholderia_xenovorans_LB400_NC_007952.fna	3360000	0.628355	4.29e-07	3.31491	4.82e-06	0.394954	1.29415e-07	2920000	0.634757	3.23e-07	3.99287	5.78e-06	0.5718	8.08942e-08
Burkholderia_xenovorans_LB400_NC_007953.fna	1470000	0.617271	5.98e-07	2.73152	3.31e-06	0.411924	2.18926e-07	1260000	0.623197	4.77e-07	3.27577	3.95e-06	0.531256	1.45615e-07
Campylobacter_jejuni_NC_002163.fna	1640000	0.305486	6.3e-07	1.67148	5.78e-06	6.7923	3.76911e-07	1530000	0.308242	2.62e-07	3.07555	6.31e-06	8.17552	8.5188e-08
Campylobacter_jejuni_RM1221_NC_003912.fna	1780000	0.303061	6.93e-07	1.64515	5.8e-06	6.69174	4.21238e-07	1620000	0.305943	3.42e-07	2.16956	6.33e-06	8.5513	1.57636e-07
Candidatus_Blochmannia_floridanus_NC_005061.fna	705554	0.273832	1.59e-06	1.16416	9.18e-07	1.51215	1.36579e-06	586938	0.289003	3.18e-07	1.76169	1.47e-06	1.3151	1.80508e-07
Candidatus_Blochmannia_pennsylvanicus_BPEN_NC_007292.fna	791651	0.295647	7.27e-07	1.3439	9.95e-07	2.18357	5.40963e-07	607149	0.320594	1.92e-07	2.53025	1.49e-06	1.74968	7.58818e-08
Candidatus_Pelagibacter_ubique_HTCC1062_NC_007205.fna	1310000	0.296831	8.97e-07	2.05046	3.16e-06	4.55635	4.37463e-07	1250000	0.298123	6.51e-07	2.51836	3.64e-06	4.32107	2.58502e-07
Carboxydothermus_hydrogenoformans_Z2901_NC_007503.fna	2400000	0.420497	1.25e-06	1.64771	4.7e-06	28.2765	7.58629e-07	2170000	0.423991	3.73e-07	2.41251	4.98e-06	44.6632	1.54611e-07
Caulobacter_crescentus_NC_002696.fna	4020000	0.67214	3.24e-07	4.21307	3.96e-06	0.857884	7.69035e-08	3640000	0.676766	2.46e-07	4.30296	5.14e-06	1.07312	5.71699e-08
Chlamydia_muridarum_NC_002620.fna	1070000	0.403365	7.25e-07	1.45383	2.26e-06	8.07823	4.98683e-07	965946	0.406917	2.36e-07	2.74787	2.41e-06	4.09827	8.58847e-08
Chlamydia_trachomatis_A_HAR-13_NC_007429.fna	1040000	0.413026	6.97e-07	1.56126	2.1e-06	7.58262	4.46434e-07	941688	0.416467	2.27e-07	2.9941	2.24e-06	3.51388	7.58158e-08
Chlamydia_trachomatis_NC_000117.fna	1040000	0.413073	7.07e-07	1.5661	2.11e-06	7.71691	4.5144e-07	939501	0.416566	2.25e-07	3.02102	2.24e-06	3.52538	7.44782e-08
Chlamydophila_abortus_S26_3_NC_004552.fna	1140000	0.398664	4.85e-07	1.85378	1.5e-06	5.88783	2.61628e-07	1000000	0.404933	2e-07	3.38594	1.73e-06	3.14764	5.90678e-08
Chlamydophila_caviae_NC_003361.fna	1170000	0.392229	5.02e-07	1.83999	1.75e-06	5.08561	2.72828e-07	1050000	0.39825	1.99e-07	3.83259	2e-06	2.52765	5.19231e-08
Chlamydophila_felis_Fe_C-56_NC_007899.fna	1170000	0.393754	5.31e-07	1.74694	1.81e-06	6.04787	3.0396e-07	1060000	0.399501	2.29e-07	3.33586	1.98e-06	3.38094	6.8648e-08
Chlamydophila_pneumoniae_AR39_NC_002179.fna	1230000	0.405777	5.56e-07	1.84281	1.97e-06	5.95635	3.01713e-07	1090000	0.413424	2.52e-07	3.00992	2.13e-06	3.60516	8.37232e-08
Chlamydophila_pneumoniae_CWL029_NC_000922.fna	1230000	0.405762	5.33e-07	1.85862	1.97e-06	6.83644	2.86772e-07	1110000	0.412812	2.67e-07	3.04872	2.13e-06	3.55586	8.75777e-08
Chlamydophila_pneumoniae_J138_NC_002491.fna	1230000	0.405815	5.29e-07	1.84837	1.97e-06	6.86084	2.86198e-07	1100000	0.413538	2.61e-07	3.07643	2.11e-06	3.57639	8.48386e-08
Chlamydophila_pneumoniae_TW_183_NC_005043.fna	1230000	0.405726	5.25e-07	1.84938	1.96e-06	6.83629	2.83879e-07	1100000	0.412945	2.6e-07	3.14798	2.11e-06	3.57117	8.25926e-08
Chlorobium_chlorochromatii_CaD3_NC_007514.fna	2570000	0.442782	7.74e-07	3.45028	2.99e-06	18.3982	2.2433e-07	2270000	0.450643	6.07e-07	5.3327	3.56e-06	11.4875	1.13826e-07
Chlorobium_tepidum_TLS_NC_002932.fna	2150000	0.565296	4.37e-07	2.07755	2.67e-06	2.58505	2.10344e-07	1900000	0.576608	2.52e-07	3.03376	3.21e-06	0.0477271	8.30652e-08
Chromobacterium_violaceum_NC_005085.fna	4750000	0.648337	7.86e-07	2.02136	4.85e-06	0.257699	3.88847e-07	4210000	0.657108	5.17e-07	2.36011	6.42e-06	0.70277	2.19058e-07
Chromohalobacter_salexigens_DSM_3043_NC_007963.fna	3700000	0.639119	5.63e-07	1.98333	2.9e-06	0.701999	2.83866e-07	3310000	0.644842	3.31e-07	2.42078	3.75e-06	0.936147	1.36733e-07
Clostridium_acetobutylicum_NC_003030.fna	3940000	0.309258	1.75e-06	1.09535	1.35e-06	2.37852	1.59766e-06	3380000	0.315046	3.41e-07	2.4913	1.39e-06	3.09437	1.36876e-07
Clostridium_perfringens_ATCC_13124_NC_008261.fna	3260000	0.283792	2.14e-06	1.02895	1.72e-06	1.68421	2.07979e-06	2710000	0.294066	3.32e-07	2.82378	1.88e-06	1.91438	1.17573e-07
Clostridium_perfringens_NC_003366.fna	3030000	0.285661	2.15e-06	1.02772	1.71e-06	1.6573	2.09201e-06	2530000	0.294723	3.63e-07	2.84437	1.91e-06	1.86085	1.27621e-07
Clostridium_perfringens_SM101_NC_008262.fna	2900000	0.28249	2.02e-06	1.03793	1.66e-06	1.70351	1.94618e-06	2360000	0.291651	3.56e-07	2.84961	1.84e-06	1.91962	1.24929e-07
Clostridium_tetani_E88_NC_004557.fna	2800000	0.287493	2.47e-06	0.996912	1.78e-06	2.15216	2.47765e-06	2400000	0.290809	3.5e-07	2.24223	1.64e-06	3.14858	1.56095e-07
Colwellia_psychrerythraea_34H_NC_003910.fna	5370000	0.380054	3.06e-07	2.78781	1.25e-06	3.13125	1.09764e-07	4550000	0.388219	2.18e-07	3.92349	1.82e-06	2.29303	5.55628e-08
Corynebacterium_diphtheriae_NC_002935.fna	2490000	0.534785	6.56e-07	1.70363	1.06e-06	1.38688	3.8506e-07	2190000	0.540756	4.94e-07	1.89602	1.37e-06	0.00431438	2.60546e-07
Corynebacterium_efficiens_YS-314_NC_004369.fna	3150000	0.6314	3.43e-07	3.06099	2.33e-06	1.05691	1.12055e-07	2890000	0.637724	3.1e-07	2.77115	2.96e-06	1.35466	1.11867e-07
Corynebacterium_glutamicum_ATCC_13032_Bielefeld_NC_006958.fna	3280000	0.538418	3.94e-07	2.32512	1.46e-06	0.770499	1.69454e-07	2870000	0.547757	3.13e-07	2.75826	1.9e-06	0.0376896	1.13477e-07
Corynebacterium_glutamicum_ATCC_13032_Kitasato_NC_003450.fna	3310000	0.538103	4.11e-07	2.26602	1.45e-06	0.799413	1.81375e-07	2860000	0.548027	3.01e-07	3.10898	1.92e-06	0.0454441	9.68163e-08
Corynebacterium_jeikeium_K411_NC_007164.fna	2460000	0.613954	4.35e-07	2.23167	1.22e-06	0.506343	1.94921e-07	2200000	0.622432	2.79e-07	2.57256	1.96e-06	0.82621	1.08452e-07
Coxiella_burnetii_NC_002971.fna	2000000	0.426605	3.49e-07	2.20528	2.71e-06	20.0609	1.58257e-07	1690000	0.429332	2.12e-07	2.65632	3.28e-06	16.9856	7.98097e-08
Cyanobacteria_bacterium_Yellowstone_A-Prime_NC_007775.fna	2930000	0.602373	2.07e-07	3.87977	2.65e-06	0.0302848	5.33537e-08	2490000	0.611382	1.98e-07	3.29897	3.31e-06	0.103058	6.00187e-08
Cyanobacteria_bacterium_Yellowstone_B-Prime_NC_007776.fna	3050000	0.584503	1.87e-07	4.22772	2.66e-06	0.100506	4.42319e-08	2600000	0.593413	1.77e-07	3.98267	3.28e-06	0.381253	4.44425e-08
Cytophaga_hutchinsonii_ATCC_33406_NC_008255.fna	4430000	0.388465	4.98e-07	2.29322	2.08e-06	6.06478	2.17162e-07	3990000	0.396137	3.49e-07	3.54881	2.52e-06	6.20416	9.83428e-08
Dechloromonas_aromatica_RCB_NC_007298.fna	4500000	0.592472	6.46e-07	2.06914	2.8e-06	0.0201295	3.12207e-07	4130000	0.598727	4.56e-07	2.52684	3.44e-06	0.230127	1.80463e-07
Dehalococcoides_CBDB1_NC_007356.fna	1400000	0.470259	4.35e-07	2.13612	2.41e-06	33.4912	2.0364e-07	1260000	0.478549	2.54e-07	3.47142	2.88e-06	1490.48	7.31689e-08
Dehalococcoides_ethenogenes_195_NC_002936.fna	1470000	0.488503	5.13e-07	2.70523	2.83e-06	152.608	1.89633e-07	1320000	0.496154	3.72e-07	4.87508	3.31e-06	35.0761	7.63064e-08
Deinococcus_geothermalis_DSM_11300_NC_008025.fna	2470000	0.666362	2.78e-07	3.47318	1.58e-06	0.538563	8.00419e-08	2230000	0.669954	2.14e-07	3.03278	2.5e-06	0.603853	7.05623e-08
Deinococcus_radiodurans_NC_001263.fna	2650000	0.670104	2.94e-07	4.32806	2.17e-06	0.145136	6.79288e-08	2390000	0.676293	2.2e-07	3.84292	3.34e-06	0.302565	5.72481e-08
Deinococcus_radiodurans_NC_001264.fna	412345	0.666881	4.86e-07	2.51744	2.26e-06	0.203681	1.93053e-07	384939	0.671766	3.78e-07	1.86037	3.19e-06	0.301158	2.03185e-07
Desulfitobacterium_hafniense_Y51_NC_007907.fna	5730000	0.473599	6.3e-07	1.88698	1.97e-06	33.9662	3.33867e-07	4860000	0.484845	3.37e-07	2.58935	2.35e-06	679.718	1.30148e-07
Desulfotalea_psychrophila_LSv54_NC_006138.fna	3520000	0.468112	7.59e-07	1.59182	1.89e-06	77.6224	4.76813e-07	3020000	0.476626	3.46e-07	2.79144	2.07e-06	31.6589	1.2395e-07
Desulfovibrio_desulfuricans_G20_NC_007519.fna	3730000	0.578361	8.01e-07	2.28257	2.82e-06	1.93581	3.5092e-07	3380000	0.580956	5.36e-07	3.18279	3.32e-06	0.715478	1.68406e-07
Desulfovibrio_vulgaris_Hildenborough_NC_002937.fna	3570000	0.631426	6.76e-07	1.74723	1.91e-06	0.899698	3.86898e-07	3070000	0.63417	3.65e-07	2.41582	2.61e-06	1.06208	1.51087e-07
Ehrlichia_canis_Jake_NC_007354.fna	1320000	0.289577	1.8e-06	1.20877	7.69e-07	1.4427	1.48912e-06	948456	0.309901	3.42e-07	2.0932	1.14e-06	1.42786	1.63386e-07
Ehrlichia_chaffeensis_Arkansas_NC_007799.fna	1180000	0.301007	1.57e-06	1.20258	7.14e-07	1.53483	1.30553e-06	936348	0.314194	3.16e-07	2.22988	1e-06	1.46871	1.41712e-07
Ehrlichia_ruminantium_Gardel_NC_006831.fna	1500000	0.275126	1.55e-06	1.13469	7.29e-07	1.18118	1.36601e-06	958695	0.30571	3.03e-07	2.12097	9.86e-07	1.19598	1.42859e-07
Ehrlichia_ruminantium_str_Welgevonden_NC_006832.fna	1510000	0.274789	1.59e-06	1.14173	7.37e-07	1.19283	1.39262e-06	958464	0.305786	3.15e-07	2.05918	9.87e-07	1.21451	1.52974e-07
Ehrlichia_ruminantium_Welgevonden_NC_005295.fna	1520000	0.274788	1.55e-06	1.15873	7.37e-07	1.19228	1.33767e-06	940827	0.306767	3.27e-07	2.00875	9.96e-07	1.21537	1.62788e-07
Enterococcus_faecalis_V583_NC_004668.fna	3220000	0.375274	1.12e-06	1.65054	2.36e-06	6.98626	6.78566e-07	2770000	0.380876	4.04e-07	1.91466	3.08e-06	8.53326	2.11004e-07
Erwinia_carotovora_atroseptica_SCRI1043_NC_004547.fna	5060000	0.509673	5.94e-07	1.90032	1.84e-06	93.9701	3.12579e-07	4350000	0.521846	4.1e-07	2.28272	2.47e-06	1.46686	1.7961e-07
Erythrobacter_litoralis_HTCC2594_NC_007722.fna	3050000	0.630685	2.8e-07	3.39324	3.78e-06	0.679099	8.2517e-08	2800000	0.634292	2.6e-07	3.64214	4.51e-06	0.778182	7.13866e-08
Escherichia_coli_536_NC_008253.fna	4940000	0.505175	4.17e-07	3.07436	2.09e-06	534.222	1.35638e-07	4340000	0.515136	3.27e-07	3.65466	2.78e-06	6.90506	8.94748e-08
Escherichia_coli_CFT073_NC_004431.fna	5530000	0.50383	4.29e-07	3.24926	2.06e-06	505.289	1.3203e-07	4840000	0.514799	3.98e-07	2.94733	2.67e-06	11.171	1.35037e-07
Escherichia_coli_K-12_NC_000913.fna	4640000	0.507897	3.46e-07	3.07667	2.15e-06	228.948	1.12459e-07	4040000	0.518927	2.52e-07	3.56931	2.92e-06	2.75834	7.06019e-08
Escherichia_coli_O157H7_EDL933_NC_002655.fna	5230000	0.504748	7.71e-07	3.93855	2.09e-06	695.97	1.95757e-07	4740000	0.513884	3.34e-07	4.11428	2.73e-06	3.46033	8.11807e-08
Escherichia_coli_O157H7_NC_002695.fna	5500000	0.505371	5.03e-07	2.61827	2.07e-06	498.584	1.92112e-07	4750000	0.516243	4.07e-07	2.83112	2.75e-06	2.83231	1.43759e-07
Escherichia_coli_UTI89_NC_007946.fna	5070000	0.506042	4.15e-07	3.00294	2.1e-06	493.884	1.38198e-07	4620000	0.515036	3.1e-07	3.68837	2.72e-06	8.28143	8.4048e-08
Francisella_tularensis_FSC_198_NC_008245.fna	1890000	0.3226	4.89e-07	1.72769	1.33e-06	2.24799	2.83037e-07	1500000	0.329592	2.65e-07	2.38594	1.75e-06	1.90726	1.11067e-07
Francisella_tularensis_holarctica_NC_007880.fna	1900000	0.321526	4.74e-07	1.6612	1.33e-06	2.28906	2.85336e-07	1560000	0.328697	2.5e-07	2.30613	1.75e-06	1.86583	1.08407e-07
Francisella_tularensis_tularensis_NC_006570.fna	1890000	0.322593	4.9e-07	1.72922	1.33e-06	2.24813	2.83365e-07	1500000	0.329584	2.68e-07	2.36138	1.75e-06	1.91033	1.13493e-07
Frankia_alni_ACN14a_NC_008278.fna	7500000	0.728281	4.79e-07	2.29031	3.96e-06	1.07879	2.09142e-07	6490000	0.730239	4.06e-07	2.33865	4.84e-06	1.1311	1.73604e-07
Frankia_CcI3_NC_007777.fna	5430000	0.700788	4.74e-07	2.08743	2.88e-06	1.06081	2.27073e-07	4620000	0.705385	3.77e-07	2.23528	3.57e-06	1.152	1.68659e-07
Fusobacterium_nucleatum_NC_003454.fna	2170000	0.271516	1.6e-06	1.17063	3.07e-06	2.92578	1.36679e-06	1940000	0.273938	3.31e-07	2.3918	3.21e-06	3.8148	1.38389e-07
Geobacillus_kaustophilus_HTA426_NC_006510.fna	3540000	0.520862	1.02e-06	1.85883	3.9e-06	128.211	5.48732e-07	3020000	0.529403	4.97e-07	2.36976	4.71e-06	10.3943	2.09726e-07
Geobacter_metallireducens_GS_15_NC_007517.fna	4000000	0.595095	6.37e-07	2.079	1.61e-06	0.00808676	3.06397e-07	3630000	0.603579	5.73e-07	1.89009	2.06e-06	0.300117	3.0316e-07
Geobacter_sulfurreducens_NC_002939.fna	3810000	0.609373	5.86e-07	2.06158	1.46e-06	0.0717376	2.84248e-07	3420000	0.616179	4.7e-07	1.96737	1.98e-06	0.382192	2.38898e-07
Gloeobacter_violaceus_NC_005125.fna	4660000	0.619979	2.28e-07	3.32635	1.8e-06	0.0105952	6.85436e-08	4170000	0.628632	2.07e-07	3.24878	2.31e-06	0.0520403	6.37162e-08
Gluconobacter_oxydans_621H_NC_006677.fna	2700000	0.610722	6.93e-07	1.68234	2.28e-06	0.157624	4.11926e-07	2440000	0.617097	3.25e-07	2.62424	2.75e-06	0.560935	1.23845e-07
Haemophilus_ducreyi_35000HP_NC_002940.fna	1700000	0.382205	5.42e-07	2.09471	2.01e-06	4.18298	2.58747e-07	1450000	0.387382	2.88e-07	2.62109	2.78e-06	3.17862	1.09878e-07
Haemophilus_influenzae_86_028NP_NC_007146.fna	1830000	0.381479	3.39e-07	2.78692	2.41e-06	5.81344	1.2164e-07	1550000	0.388234	2.15e-07	3.63641	3.17e-06	3.26201	5.91242e-08
Haemophilus_influenzae_NC_000907.fna	1910000	0.381523	3.41e-07	2.64157	2.46e-06	6.04781	1.2909e-07	1660000	0.387791	2.22e-07	3.98629	3.24e-06	3.01655	5.56909e-08
Haemophilus_somnus_129PT_NC_008309.fna	2010000	0.371974	4.69e-07	1.96823	1.91e-06	5.07325	2.38285e-07	1770000	0.377593	2.72e-07	2.71614	2.57e-06	3.32882	1.00142e-07
Hahella_chejuensis_KCTC_2396_NC_007645.fna	7220000	0.538697	6.23e-07	1.93174	1.91e-06	2.77401	3.22507e-07	6370000	0.547781	3.97e-07	2.36565	2.44e-06	0.0031034	1.67819e-07
Haloarcula_marismortui_ATCC_43049_NC_006395.fna	410551	0.591191	3.75e-07	1.90377	2.44e-06	1.04366	1.96978e-07	344169	0.605468	3.01e-07	2.11255	3.34e-06	1.18246	1.42482e-07
Haloarcula_marismortui_ATCC_43049_NC_006396.fna	3130000	0.623639	3.55e-07	2.36173	3.58e-06	0.960121	1.50314e-07	2710000	0.632957	2.56e-07	2.66779	4.61e-06	1.1003	9.59596e-08
Haloarcula_marismortui_ATCC_43049_NC_006397.fna	288047	0.57229	3.18e-07	2.82373	1.9e-06	1.22678	1.12617e-07	221532	0.58584	2.26e-07	2.61885	2.8e-06	1.27749	8.62974e-08
Halobacterium_sp_NC_002607.fna	2010000	0.67913	7.73e-07	1.57133	5.14e-06	0.974908	4.9194e-07	1790000	0.685075	4.1e-07	1.9797	6.29e-06	1.05249	2.07102e-07
Haloquadratum_walsbyi_NC_008212.fna	3130000	0.478639	3.64e-07	3.14463	1.78e-06	0.371049	1.15753e-07	2340000	0.488434	3.22e-07	4.15017	2.55e-06	226.194	7.75872e-08
Helicobacter_acinonychis_Sheeba_NC_008229.fna	1550000	0.381775	4.2e-07	2.1892	5.55e-06	17.5602	1.91851e-07	1390000	0.387855	2.99e-07	3.1069	5.89e-06	27.8086	9.62374e-08
Helicobacter_hepaticus_NC_004917.fna	1800000	0.359313	4.45e-07	2.0339	3.25e-06	5.41483	2.18791e-07	1680000	0.363262	2.48e-07	3.16513	3.68e-06	6.14776	7.83538e-08
Helicobacter_pylori_HPAG1_NC_008086.fna	1600000	0.390825	3.93e-07	2.54317	5.83e-06	18.9608	1.54532e-07	1470000	0.397356	2.62e-07	3.30552	6.1e-06	40.3267	7.92614e-08
Idiomarina_loihiensis_L2TR_NC_006512.fna	2840000	0.470402	3.53e-07	2.55087	1.54e-06	25.3285	1.38384e-07	2620000	0.474899	2.13e-07	4.12952	2.05e-06	31.7027	5.15798e-08
Jannaschia_CCS1_NC_007802.fna	4320000	0.623322	3.63e-07	2.22291	2.14e-06	0.427045	1.63299e-07	3920000	0.626919	2.53e-07	2.97042	2.72e-06	0.536496	8.51731e-08
Lactobacillus_acidophilus_NCFM_NC_006814.fna	1990000	0.347147	8.56e-07	2.03187	1.5e-06	2.58895	4.21287e-07	1760000	0.352107	3.15e-07	3.80135	2.2e-06	1.51105	8.28653e-08
Lactobacillus_delbrueckii_bulgaricus_NC_008054.fna	1870000	0.49719	7.24e-07	2.51539	2.97e-06	1935.14	2.87828e-07	1370000	0.516168	3.68e-07	2.67864	3.94e-06	4.78358	1.37383e-07
Lactobacillus_johnsonii_NCC_533_NC_005362.fna	1990000	0.346112	8.81e-07	1.8618	1.6e-06	2.86603	4.73198e-07	1780000	0.349635	3.37e-07	3.80876	2.18e-06	2.02872	8.84802e-08
Lactobacillus_plantarum_NC_004567.fna	3310000	0.444667	7.01e-07	1.81932	1.49e-06	4.11721	3.85309e-07	2770000	0.455239	3.18e-07	2.86992	2.07e-06	3.82863	1.10804e-07
Lactobacillus_sakei_23K_NC_007576.fna	1880000	0.412576	6.75e-07	2.21645	1.83e-06	5.00922	3.04541e-07	1640000	0.419099	2.23e-07	3.74523	2.65e-06	4.43091	5.95424e-08
Lactobacillus_salivarius_UCC118_NC_007929.fna	1830000	0.329412	1.32e-06	1.41322	1.1e-06	1.86756	9.34037e-07	1540000	0.331644	3.1e-07	2.92061	1.85e-06	1.22483	1.06142e-07
Lactococcus_lactis_NC_002662.fna	2370000	0.353294	7.69e-07	2.18661	2.91e-06	5.35399	3.51686e-07	2020000	0.361697	2.46e-07	3.53693	3.62e-06	3.3167	6.95518e-08
Lawsonia_intracellularis_PHE_MN1_00_NC_008011.fna	1460000	0.332845	7.06e-07	1.91435	1.22e-06	2.67713	3.68794e-07	1220000	0.347336	2.17e-07	2.91279	1.93e-06	2.15426	7.4499e-08
Legionella_pneumophila_Lens_NC_006369.fna	3350000	0.38415	4.5e-07	1.81711	1.83e-06	5.34341	2.47646e-07	2920000	0.391073	2.77e-07	2.49405	2.21e-06	4.81477	1.11064e-07
Legionella_pneumophila_Paris_NC_006368.fna	3500000	0.383719	4.27e-07	1.86925	1.83e-06	5.43809	2.28434e-07	3050000	0.390717	2.9e-07	2.6366	2.21e-06	4.89064	1.0999e-07
Legionella_pneumophila_Philadelphia_1_NC_002942.fna	3400000	0.382695	4.2e-07	1.85318	1.83e-06	5.20056	2.26637e-07	3010000	0.389239	2.58e-07	2.78199	2.2e-06	4.71959	9.27394e-08
Leifsonia_xyli_xyli_CTCB0_NC_006087.fna	2580000	0.67676	4.37e-07	2.30581	3.06e-06	1.06295	1.89521e-07	1810000	0.683928	2.82e-07	2.85713	4.06e-06	1.20735	9.87004e-08
Leptospira_interrogans_serovar_Copenhageni_NC_005823.fna	4280000	0.350495	4.32e-07	2.1309	4.48e-06	8.30532	2.02731e-07	3200000	0.366788	2.8e-07	3.59318	4.88e-06	10.8367	7.79254e-08
Leptospira_interrogans_serovar_Copenhageni_NC_005824.fna	350178	0.349811	4.02e-07	1.93907	4.69e-06	8.5337	2.07316e-07	261255	0.366576	2.31e-07	2.69249	5.25e-06	10.3846	8.57942e-08
Leptospira_interrogans_serovar_Lai_NC_004342.fna	4330000	0.350052	4.2e-07	2.19313	4.47e-06	8.24567	1.91507e-07	3390000	0.364132	2.76e-07	3.77592	4.92e-06	10.6745	7.30948e-08
Leptospira_interrogans_serovar_Lai_NC_004343.fna	358940	0.351443	3.94e-07	1.98783	4.59e-06	8.497	1.98206e-07	287205	0.364781	2.26e-07	2.67819	5.16e-06	10.085	8.43853e-08
Listeria_innocua_NC_003212.fna	3010000	0.37439	9.82e-07	1.58714	1.98e-06	6.49724	6.18723e-07	2680000	0.378341	2.94e-07	2.44102	2.57e-06	7.77705	1.20441e-07
Listeria_monocytogenes_4b_F2365_NC_002973.fna	2910000	0.380412	8.66e-07	1.66029	2.01e-06	7.08515	5.21596e-07	2570000	0.384946	2.42e-07	2.80014	2.61e-06	8.2776	8.64243e-08
Listeria_monocytogenes_NC_003210.fna	2940000	0.37981	8.93e-07	1.66175	1.99e-06	6.76116	5.37385e-07	2620000	0.384428	2.64e-07	2.73134	2.6e-06	7.93555	9.66559e-08
Magnetospirillum_magneticum_AMB_1_NC_007626.fna	4970000	0.650935	7.91e-07	2.22052	2.91e-06	0.675953	3.56223e-07	4390000	0.661321	5.01e-07	3.14709	4.19e-06	0.975735	1.59195e-07
Mannheimia_succiniciproducens_MBEL55E_NC_006300.fna	2310000	0.42538	4.05e-07	2.87254	3.36e-06	16.5886	1.4099e-07	2080000	0.433946	2.3e-07	3.97625	4.02e-06	10.3621	5.78434e-08
Mesoplasma_florum_L1_NC_006055.fna	793221	0.270205	2.04e-06	1.23667	2.83e-06	2.50818	1.64959e-06	736869	0.270487	2.96e-07	2.21649	3.58e-06	2.05933	1.33544e-07
Mesorhizobium_BNC1_NC_008254.fna	4410000	0.610668	3.19e-07	3.42358	2.66e-06	0.224567	9.31773e-08	3950000	0.615585	2.72e-07	3.75985	3.1e-06	0.310493	7.23433e-08
Mesorhizobium_loti_NC_002678.fna	7040000	0.627471	4.17e-07	3.77403	4.09e-06	0.444656	1.10492e-07	6120000	0.634719	4.19e-07	3.90603	5.06e-06	0.675612	1.0727e-07
Methanobacterium_thermoautotrophicum_NC_000916.fna	1750000	0.495439	4.75e-07	2.68181	3.04e-06	18.871	1.77119e-07	1580000	0.505583	2.68e-07	3.33435	3.59e-06	1.69972	8.03755e-08
Methanococcoides_burtonii_DSM_6242_NC_007955.fna	2580000	0.407581	5.07e-07	1.83144	1.56e-06	2.28788	2.76831e-07	2070000	0.422384	2.69e-07	2.85674	2.03e-06	1.52504	9.41633e-08
Methanococcus_jannaschii_NC_000909.fna	1660000	0.314263	4.97e-07	1.67956	2.48e-06	2.86567	2.95911e-07	1470000	0.319601	2.53e-07	3.62946	2.92e-06	2.19968	6.97073e-08
Methanococcus_maripaludis_S2_NC_005791.fna	1660000	0.331003	5.15e-07	2.242	3.55e-06	6.4883	2.29706e-07	1480000	0.340146	2.76e-07	3.46781	4.06e-06	8.07731	7.95891e-08
Methanopyrus_kandleri_NC_003551.fna	1690000	0.611592	4.73e-07	1.89651	2.59e-06	1.20829	2.49405e-07	1510000	0.611975	4.5e-07	1.84422	3.28e-06	1.40412	2.44006e-07
Methanosarcina_acetivorans_NC_003552.fna	5750000	0.426809	5.09e-07	2.10647	2.35e-06	14.0012	2.41636e-07	4260000	0.451687	4.15e-07	2.70646	2.5e-06	26105.7	1.53337e-07
Methanosarcina_barkeri_fusaro_NC_007355.fna	4840000	0.39276	3.76e-07	2.38525	2e-06	7.41435	1.57635e-07	3370000	0.422894	2.84e-07	3.51462	2.33e-06	21.0272	8.08053e-08
Methanosarcina_mazei_NC_003901.fna	4100000	0.414849	4.28e-07	2.16147	2.7e-06	12.4308	1.98013e-07	3070000	0.441823	2.74e-07	3.00724	2.89e-06	503.022	9.11134e-08
Methanosphaera_stadtmanae_NC_007681.fna	1770000	0.276337	8.62e-07	1.47599	1.2e-06	1.70471	5.84015e-07	1490000	0.291018	4.6e-07	3.00587	1.75e-06	0.201408	1.53034e-07
Methanospirillum_hungatei_JF-1_NC_007796.fna	3540000	0.45149	5.03e-07	2.16212	2.74e-06	12.2074	2.32642e-07	3050000	0.461301	4.08e-07	2.29218	3.11e-06	8.97417	1.77996e-07
Methylobacillus_flagellatus_KT_NC_007947.fna	2970000	0.557191	5.41e-07	1.85635	2.41e-06	0.000241863	2.91432e-07	2680000	0.565496	3.43e-07	2.29422	2.84e-06	0.453962	1.49506e-07
Methylococcus_capsulatus_Bath_NC_002977.fna	3300000	0.635846	4.55e-07	2.17681	2.37e-06	0.359895	2.09021e-07	2960000	0.639553	2.65e-07	3.00749	3.03e-06	0.603501	8.81133e-08
Moorella_thermoacetica_ATCC_39073_NC_007644.fna	2630000	0.557915	7.09e-07	2.38298	3.25e-06	3.83673	2.97527e-07	2270000	0.569271	4.19e-07	2.15294	3.8e-06	0.683447	1.94618e-07
Mycobacterium_avium_paratuberculosis_NC_002944.fna	4830000	0.692986	3.42e-07	3.0948	3.91e-06	0.922694	1.10508e-07	4420000	0.696525	2.6e-07	2.67752	4.96e-06	0.984872	9.71048e-08
Mycobacterium_bovis_NC_002945.fna	4350000	0.65633	4.97e-07	3.62409	2.8e-06	0.949551	1.37138e-07	3940000	0.659031	3.81e-07	4.46628	3.34e-06	0.959816	8.53059e-08
Mycobacterium_leprae_NC_002677.fna	3270000	0.577967	4.65e-07	1.50385	1.41e-06	0.608834	3.09206e-07	1620000	0.601211	1.71e-07	3.59036	2.11e-06	0.885439	4.76275e-08
Mycobacterium_MCS_NC_008146.fna	5710000	0.684534	3.45e-07	2.58814	4.14e-06	1.21882	1.333e-07	5310000	0.687899	2.94e-07	2.52032	4.86e-06	1.2454	1.16652e-07
Mycobacterium_tuberculosis_CDC1551_NC_000962.fna	4400000	0.656068	5.52e-07	3.63871	2.8e-06	0.949687	1.51702e-07	3990000	0.657677	3.77e-07	4.32625	3.27e-06	0.951374	8.71424e-08
Mycobacterium_tuberculosis_H37Rv_NC_002755.fna	4410000	0.656141	5.73e-07	3.56825	2.8e-06	0.948337	1.60583e-07	4020000	0.659007	4.74e-07	5.2045	3.34e-06	0.956473	9.1075e-08
Mycoplasma_capricolum_ATCC_27343_NC_007633.fna	1010000	0.237704	8.83e-07	1.63339	3.16e-06	2.54036	5.40593e-07	891966	0.240013	3.53e-07	2.03509	4.13e-06	2.26217	1.73457e-07
Mycoplasma_gallisepticum_NC_004829.fna	996419	0.3145	9.66e-07	2.08986	2.44e-06	2.1249	4.62232e-07	875940	0.318619	4.8e-07	2.95339	3.05e-06	1.35025	1.62525e-07
Mycoplasma_genitalium_NC_000908.fna	580073	0.316891	9.62e-07	2.14653	4.28e-06	4.46962	4.48165e-07	528615	0.315479	6.08e-07	2.41074	4.8e-06	4.51303	2.52205e-07
Mycoplasma_hyopneumoniae_232_NC_006360.fna	892755	0.285612	6.48e-07	1.95997	8.94e-06	8.71932	3.30617e-07	806811	0.293887	3.6e-07	2.30757	8.58e-06	11.71	1.56008e-07
Mycoplasma_hyopneumoniae_7448_NC_007332.fna	920076	0.284889	6.29e-07	1.97537	8.82e-06	8.18422	3.18421e-07	791463	0.2931	3.55e-07	2.32471	8.42e-06	11.1967	1.52707e-07
Mycoplasma_hyopneumoniae_J_NC_007295.fna	897402	0.285222	6.09e-07	1.93576	8.77e-06	8.28953	3.14605e-07	787146	0.293975	3.71e-07	2.18723	8.3e-06	11.315	1.69621e-07
Mycoplasma_mobile_163K_NC_006908.fna	777076	0.249513	6.54e-07	2.12074	6.13e-06	3.85445	3.08383e-07	706170	0.253466	4.84e-07	3.78645	6.67e-06	5.30428	1.27824e-07
Mycoplasma_mycoides_NC_005364.fna	1210000	0.239657	8.47e-07	1.61258	3.06e-06	2.47418	5.25245e-07	991773	0.240891	3.13e-07	2.1775	4.09e-06	2.15141	1.43743e-07
Mycoplasma_penetrans_NC_004432.fna	1360000	0.257175	1.06e-06	2.12782	2.72e-06	2.10871	4.98162e-07	1210000	0.264793	5.11e-07	3.72571	3.42e-06	1.54676	1.37155e-07
Mycoplasma_pneumonia_NC_000912.fna	816391	0.40008	5.22e-07	2.98595	2.98e-06	7.44965	1.74819e-07	721302	0.407468	2.73e-07	2.81939	3.23e-06	8.31529	9.68295e-08
Mycoplasma_pulmonis_NC_002771.fna	963876	0.266365	8.03e-07	1.71747	7.38e-06	5.81038	4.67548e-07	873648	0.272941	4.73e-07	2.29202	7.31e-06	8.12291	2.06368e-07
Mycoplasma_synoviae_53_NC_007294.fna	799473	0.284952	9.76e-07	2.09141	4.24e-06	3.74016	4.66671e-07	713748	0.287707	9.09e-07	2.42032	4.3e-06	4.83494	3.7557e-07
Myxococcus_xanthus_DK_1622_NC_008095.fna	9140000	0.688912	5.58e-07	2.38456	2.57e-06	1.1538	2.34005e-07	8360000	0.691275	3.52e-07	3.53968	3.52e-06	1.23939	9.9444e-08
Nanoarchaeum_equitans_NC_005213.fna	490882	0.315595	3.21e-07	1.58093	2.83e-06	3.27983	2.03045e-07	456324	0.312011	1.33e-07	3.8911	2.83e-06	3.75366	3.41806e-08
Natronomonas_pharaonis_NC_007426.fna	2600000	0.634402	4.22e-07	2.69479	5.16e-06	0.704723	1.56598e-07	2350000	0.63944	3.57e-07	2.84907	6.17e-06	0.856107	1.25304e-07
Neisseria_gonorrhoeae_FA_1090_NC_002946.fna	2150000	0.526897	5.71e-07	2.07657	4.45e-06	112.773	2.74973e-07	1690000	0.539912	3.64e-07	2.65646	4.96e-06	2.08234	1.37024e-07
Neisseria_meningitidis_MC58_NC_003112.fna	2270000	0.515278	6.01e-07	2.0492	3.99e-06	274.731	2.93285e-07	1800000	0.530804	4.14e-07	2.43074	4.54e-06	2.49301	1.70319e-07
Neisseria_meningitidis_Z2491_NC_003116.fna	2180000	0.518091	5.22e-07	2.16941	4.05e-06	247.132	2.40618e-07	1760000	0.532798	3.78e-07	2.51053	4.63e-06	2.4054	1.50566e-07
Neorickettsia_sennetsu_Miyayama_NC_007798.fna	859003	0.410843	6.12e-07	1.37472	1.24e-06	6.79805	4.45182e-07	753648	0.414078	1.71e-07	2.88515	1.42e-06	6.5516	5.9269e-08
Nitrobacter_hamburgensis_X14_NC_007964.fna	4410000	0.617138	4.35e-07	2.95182	3.7e-06	0.267262	1.47367e-07	3550000	0.626514	4.1e-07	2.90633	4.58e-06	0.542816	1.41071e-07
Nitrobacter_winogradskyi_Nb_255_NC_007406.fna	3400000	0.62049	3.57e-07	2.96806	3.97e-06	0.377981	1.20281e-07	2860000	0.630165	2.75e-07	3.58007	4.79e-06	0.645243	7.68141e-08
Nitrosococcus_oceani_ATCC_19707_NC_007484.fna	3480000	0.503176	5.43e-07	1.709	1.48e-06	567.601	3.1773e-07	2950000	0.512711	3.15e-07	2.62319	1.73e-06	1536.29	1.20083e-07
Nitrosomonas_europaea_NC_004757.fna	2810000	0.507182	4.41e-07	1.89809	2.25e-06	64.547	2.32339e-07	2410000	0.515694	3.01e-07	2.71973	2.69e-06	5.32964	1.10673e-07
Nitrosospira_multiformis_ATCC_25196_NC_007614.fna	3180000	0.539426	2.52e-07	2.72962	1.7e-06	3.32837	9.23205e-08	2720000	0.548521	1.94e-07	3.67265	1.98e-06	0.266568	5.28229e-08
Nocardia_farcinica_IFM10152_NC_006361.fna	6020000	0.708334	4.02e-07	2.92774	4.32e-06	1.15028	1.37307e-07	5450000	0.711636	3.19e-07	2.60844	5.4e-06	1.20018	1.22295e-07
Nostoc_sp_NC_003272.fna	6410000	0.413475	2.21e-07	4.36698	1.2e-06	4.08843	5.06071e-08	5270000	0.424395	2.03e-07	3.68122	1.67e-06	5.2174	5.51448e-08
Novosphingobium_aromaticivorans_DSM_12444_NC_007794.fna	3560000	0.651528	4.31e-07	2.84292	3.41e-06	0.93533	1.51605e-07	3260000	0.655484	3.19e-07	3.14026	4.11e-06	1.09971	1.01584e-07
Oceanobacillus_iheyensis_NC_004193.fna	3630000	0.356813	8.05e-07	1.43796	9.3e-07	2.24509	5.59821e-07	3060000	0.360816	2.47e-07	2.76037	1.56e-06	1.82965	8.94808e-08
Onion_yellows_phytoplasma_NC_005303.fna	860628	0.277366	9.68e-07	1.53185	6.14e-06	6.36367	6.31916e-07	628305	0.290528	5.95e-07	1.59594	6.42e-06	9.81489	3.72821e-07
Parachlamydia_sp_UWE25_NC_005861.fna	2410000	0.347173	3.15e-07	2.96426	3.13e-06	6.0995	1.06266e-07	1990000	0.360959	2.5e-07	4.46938	3.48e-06	5.71588	5.59362e-08
Pasteurella_multocida_NC_002663.fna	2260000	0.404049	4.18e-07	2.23465	1.91e-06	7.09574	1.87054e-07	2010000	0.410379	2.21e-07	3.18643	2.66e-06	3.94698	6.93566e-08
Pelobacter_carbinolicus_NC_007498.fna	3670000	0.551137	6.63e-07	1.69731	1.95e-06	8.59478	3.90618e-07	3200000	0.559934	3.98e-07	2.06203	2.29e-06	2.86075	1.93014e-07
Pelodictyon_luteolum_DSM_273_NC_007512.fna	2360000	0.5733	5.62e-07	2.00634	1.97e-06	0.154663	2.80112e-07	2110000	0.581365	3.99e-07	2.63063	2.35e-06	0.192576	1.51675e-07
Photobacterium_profundum_SS9_NC_006370.fna	4090000	0.419689	4.55e-07	2.0614	1.16e-06	3.37515	2.20724e-07	3360000	0.428303	2.56e-07	3.26559	1.79e-06	1.33663	7.83932e-08
Photobacterium_profundum_SS9_NC_006371.fna	2240000	0.412227	3.44e-07	2.28431	1.11e-06	3.6086	1.50593e-07	1800000	0.423008	2.33e-07	3.93812	1.6e-06	2.3129	5.91653e-08
Photorhabdus_luminescens_NC_005126.fna	5690000	0.428254	7.82e-07	1.63722	1.38e-06	6.33787	4.77639e-07	4610000	0.441552	5.48e-07	1.85239	1.81e-06	3.32995	2.95834e-07
Picrophilus_torridus_DSM_9790_NC_005877.fna	1550000	0.359704	4.34e-07	1.91693	2.59e-06	2.78958	2.26404e-07	1420000	0.370757	2.93e-07	2.50163	3.02e-06	4.30872	1.17124e-07
Pirellula_sp_NC_005027.fna	7150000	0.554033	3.6e-07	2.38759	3.59e-06	0.0547568	1.5078e-07	6940000	0.554576	2.08e-07	5.50378	3.84e-06	0.221093	3.77922e-08
Polaromonas_JS666_NC_007948.fna	5200000	0.624723	3.94e-07	2.89324	2.87e-06	4.49e-05	1.3618e-07	4570000	0.631579	3.52e-07	2.73097	3.77e-06	0.0775797	1.28892e-07
Porphyromonas_gingivalis_W83_NC_002950.fna	2340000	0.482879	3.54e-07	2.37618	1.44e-06	34.9257	1.48979e-07	1940000	0.493671	3.07e-07	2.49993	1.74e-06	5.42999	1.22803e-07
Prochlorococcus_marinus_CCMP1375_NC_005042.fna	1750000	0.364421	6.65e-07	1.697	1.9e-06	2.77514	3.91868e-07	1560000	0.37038	3.03e-07	2.39434	2.13e-06	2.34338	1.26548e-07
Prochlorococcus_marinus_MED4_NC_005072.fna	1660000	0.307992	4.48e-07	1.68656	2.44e-06	3.23028	2.65629e-07	1460000	0.316421	2.65e-07	2.58438	2.58e-06	3.13918	1.02539e-07
Prochlorococcus_marinus_MIT_9312_NC_007577.fna	1710000	0.312105	4.85e-07	1.70085	2.58e-06	3.46421	2.85152e-07	1530000	0.319646	2.88e-07	2.24083	2.71e-06	3.57155	1.28524e-07
Prochlorococcus_marinus_NATL2A_NC_007335.fna	1840000	0.35123	5.7e-07	1.62561	2.09e-06	3.58826	3.50638e-07	1570000	0.359794	2.85e-07	2.69424	2.33e-06	3.21908	1.05781e-07
Propionibacterium_acnes_KPA171202_NC_006085.fna	2560000	0.600107	4.49e-07	1.7241	1.45e-06	1.10892	2.60426e-07	2290000	0.602832	2.45e-07	2.92955	1.75e-06	1.38025	8.36306e-08
Pseudoalteromonas_atlantica_T6c_NC_008228.fna	5190000	0.446161	2.7e-07	2.76078	1.32e-06	8.8146	9.77984e-08	4480000	0.454191	1.93e-07	4.24709	1.7e-06	12.9369	4.54429e-08
Pseudoalteromonas_haloplanktis_TAC125_NC_007481.fna	3210000	0.402348	3.46e-07	2.8798	2.45e-06	5.56315	1.20147e-07	2810000	0.409988	2.02e-07	5.58695	2.96e-06	6.86293	3.61557e-08
Pseudoalteromonas_haloplanktis_TAC125_NC_007482.fna	635325	0.393672	2.36e-07	3.98899	2.67e-06	5.11757	5.91628e-08	555060	0.403733	1.86e-07	4.38053	3.03e-06	7.15524	4.24606e-08
Pseudomonas_aeruginosa_NC_002516.fna	6260000	0.665557	5.7e-07	2.40658	3.93e-06	0.814901	2.36851e-07	5600000	0.671419	3.55e-07	2.62014	5.41e-06	1.18079	1.35489e-07
Pseudomonas_entomophila_L48_NC_008027.fna	5890000	0.641597	5.03e-07	2.5967	3.24e-06	0.763935	1.93707e-07	5230000	0.649268	3.26e-07	3.27689	4.52e-06	1.15188	9.94846e-08
Pseudomonas_fluorescens_Pf-5_NC_004129.fna	7070000	0.633049	6.74e-07	2.08109	3e-06	0.43367	3.23869e-07	6280000	0.641079	4.43e-07	2.45481	4.25e-06	0.89055	1.80462e-07
Pseudomonas_fluorescens_PfO-1_NC_007492.fna	6440000	0.605207	4.52e-07	2.91672	2.87e-06	0.108839	1.54969e-07	5790000	0.61284	3.29e-07	3.51048	3.79e-06	0.675038	9.37194e-08
Pseudomonas_putida_KT2440_NC_002947.fna	6180000	0.615241	5.65e-07	2.27656	2.81e-06	0.46169	2.48181e-07	5370000	0.62348	3.97e-07	2.96819	3.89e-06	0.959721	1.33752e-07
Pseudomonas_syringae_phaseolicola_1448A_NC_005773.fna	5930000	0.58015	3.89e-07	2.53989	2.38e-06	0.00550114	1.53156e-07	4990000	0.58855	2.76e-07	3.23417	3.14e-06	0.42197	8.53387e-08
Pseudomonas_syringae_pv_B728a_NC_007005.fna	6090000	0.592328	4.25e-07	2.6183	2.51e-06	0.0886273	1.62319e-07	5350000	0.600051	3.19e-07	3.02744	3.31e-06	0.570861	1.0537e-07
Pseudomonas_syringae_tomato_DC3000_NC_004578.fna	6400000	0.583989	4.01e-07	2.61367	2.46e-06	0.00128197	1.53424e-07	5450000	0.593265	3.07e-07	3.2836	3.24e-06	0.357836	9.34949e-08
Psychrobacter_arcticum_273-4_NC_007204.fna	2650000	0.428002	3.37e-07	3.43876	1.85e-06	5.57568	9.80004e-08	2140000	0.445872	2.76e-07	3.92063	2.57e-06	2.92475	7.03968e-08
Psychrobacter_cryohalolentis_K5_NC_007969.fna	3060000	0.422913	3.11e-07	2.99636	1.79e-06	4.69057	1.03793e-07	2550000	0.440273	2.45e-07	3.365	2.48e-06	2.28515	7.28083e-08
Pyrobaculum_aerophilum_NC_003364.fna	2220000	0.513625	3.25e-07	2.18997	2.07e-06	45.0287	1.48404e-07	1980000	0.518993	3.05e-07	2.16436	2.24e-06	0.851363	1.40919e-07
Pyrococcus_abyssi_NC_000868.fna	1770000	0.447139	4.09e-07	1.97721	2.21e-06	1.13481	2.06857e-07	1650000	0.451147	2.57e-07	2.90514	2.39e-06	2.21756	8.84639e-08
Pyrococcus_furiosus_NC_003413.fna	1910000	0.407699	4.02e-07	1.90583	2.41e-06	3.05984	2.10932e-07	1770000	0.410971	2.46e-07	2.88797	2.38e-06	9.66347	8.51809e-08
Pyrococcus_horikoshii_NC_000961.fna	1740000	0.41879	4.47e-07	1.92801	2.32e-06	1.77845	2.31845e-07	1650000	0.422042	2.39e-07	3.5106	2.31e-06	1.75281	6.80795e-08
Ralstonia_eutropha_H16_NC_008313.fna	4050000	0.664659	5.82e-07	3.17705	4.47e-06	0.834441	1.83189e-07	3560000	0.67057	4.55e-07	2.95023	6.13e-06	1.08222	1.54225e-07
Ralstonia_eutropha_JMP134_NC_007347.fna	3810000	0.646752	4.38e-07	3.74027	3.97e-06	0.804809	1.17104e-07	3390000	0.652092	3.1e-07	3.99939	5.15e-06	1.08583	7.75118e-08
Ralstonia_eutropha_JMP134_NC_007348.fna	2730000	0.649835	3.48e-07	3.29393	3.86e-06	0.857836	1.05649e-07	2410000	0.656387	2.74e-07	3.81377	4.88e-06	1.10056	7.18449e-08
Ralstonia_metallidurans_CH34_NC_007973.fna	3930000	0.638203	4.56e-07	3.06482	3.33e-06	0.862373	1.48785e-07	3520000	0.64363	3.16e-07	3.63348	4.42e-06	1.12623	8.6969e-08
Ralstonia_metallidurans_CH34_NC_007974.fna	2580000	0.635994	4.53e-07	2.41941	3.04e-06	0.95683	1.87236e-07	2280000	0.642475	3.7e-07	2.74464	3.9e-06	1.1727	1.34808e-07
Ralstonia_solanacearum_NC_003295.fna	3720000	0.67037	5.57e-07	3.07438	4.44e-06	0.691546	1.81175e-07	3270000	0.676162	3.82e-07	3.34727	5.93e-06	1.02122	1.14123e-07
Ralstonia_solanacearum_NC_003296.fna	2090000	0.668662	6.71e-07	2.13088	3.98e-06	0.686455	3.14893e-07	1810000	0.674688	4.89e-07	2.68355	5.09e-06	0.979493	1.82221e-07
Rhizobium_etli_CFN_42_NC_007761.fna	4380000	0.612722	2.89e-07	3.96865	4.21e-06	0.299353	7.28207e-08	3780000	0.620448	2.64e-07	3.95595	5.07e-06	0.566612	6.67349e-08
Rhodobacter_sphaeroides_2_4_1_NC_007493.fna	3190000	0.690053	4.57e-07	2.32435	3.82e-06	1.0178	1.96614e-07	2840000	0.690996	3.11e-07	2.35306	5.1e-06	1.20542	1.32168e-07
Rhodobacter_sphaeroides_2_4_1_NC_007494.fna	943013	0.690114	4.55e-07	2.0552	3.72e-06	1.00328	2.2139e-07	814362	0.693365	2.74e-07	2.81047	5.04e-06	1.22363	9.74926e-08
Rhodococcus_RHA1_NC_008268.fna	7800000	0.675158	3.45e-07	2.66426	3.86e-06	1.27043	1.29492e-07	7120000	0.679241	2.97e-07	2.93245	4.48e-06	1.29736	1.0128e-07
Rhodoferax_ferrireducens_T118_NC_007901.fna	257444	0.544104	2.12e-07	3.28637	1.89e-06	11.0202	6.45089e-08	215004	0.550475	1.35e-07	5.38144	2.06e-06	0.00167637	2.50862e-08
Rhodoferax_ferrireducens_T118_NC_007908.fna	4710000	0.598793	3.77e-07	2.76706	2.93e-06	0.0992321	1.36246e-07	4230000	0.606191	3.07e-07	2.9463	3.59e-06	0.00815655	1.04198e-07
Rhodopseudomonas_palustris_BisB18_NC_007925.fna	5510000	0.649572	3.88e-07	4.05911	5.51e-06	0.714564	9.55875e-08	4720000	0.654491	3.42e-07	3.81878	6.73e-06	0.881209	8.95574e-08
Rhodopseudomonas_palustris_BisB5_NC_007958.fna	4890000	0.648078	3.72e-07	4.00779	5.78e-06	0.804799	9.28192e-08	4250000	0.653985	3.05e-07	4.25344	7.04e-06	1.02206	7.17067e-08
Rhodopseudomonas_palustris_CGA009_NC_005296.fna	5460000	0.650381	3.51e-07	4.0185	5.37e-06	0.965268	8.7346e-08	4760000	0.655382	2.61e-07	4.66673	6.6e-06	1.15562	5.59278e-08
Rhodopseudomonas_palustris_HaA2_NC_007778.fna	5330000	0.660384	4.1e-07	4.63298	6.27e-06	0.937013	8.8496e-08	4650000	0.664709	3.22e-07	4.61183	7.7e-06	1.10023	6.98204e-08
Rhodospirillum_rubrum_ATCC_11170_NC_007643.fna	4350000	0.65448	4.3e-07	2.41897	3.77e-06	0.205911	1.77762e-07	3850000	0.660965	2.57e-07	3.42286	4.86e-06	0.416511	7.50834e-08
Rickettsia_bellii_RML369_C_NC_007940.fna	1520000	0.316459	3.11e-07	2.14493	1.4e-06	2.68397	1.44993e-07	1300000	0.318456	2.23e-07	2.84876	1.61e-06	2.50531	7.82797e-08
Rickettsia_conorii_NC_003103.fna	1270000	0.324388	3.82e-07	1.84582	1.32e-06	2.8727	2.06954e-07	1030000	0.328504	2.06e-07	2.94916	1.55e-06	2.72043	6.98504e-08
Rickettsia_felis_URRWXCal2_NC_007109.fna	1490000	0.324504	3.9e-07	1.94413	1.42e-06	2.97702	2.00604e-07	1250000	0.32637	2.32e-07	3.28635	1.57e-06	2.8898	7.0595e-08
Rickettsia_prowazekii_NC_000963.fna	1110000	0.290003	4.21e-07	1.66963	8.2e-07	1.99024	2.52152e-07	840228	0.30421	2.19e-07	2.54653	1.23e-06	1.9695	8.59994e-08
Rickettsia_typhi_wilmington_NC_006142.fna	1110000	0.289194	4.04e-07	1.64976	8e-07	1.94663	2.44884e-07	839757	0.303825	1.94e-07	3.0821	1.23e-06	1.90303	6.29441e-08
Roseobacter_denitrificans_OCh_114_NC_008209.fna	4130000	0.589687	3.37e-07	2.59478	2.7e-06	0.0345865	1.29876e-07	3710000	0.594842	2.21e-07	3.93545	3.2e-06	0.00157187	5.61562e-08
Rubrobacter_xylanophilus_DSM_9941_NC_008148.fna	3230000	0.704766	8.47e-07	1.81161	2.09e-06	0.925962	4.6754e-07	2970000	0.709419	5.26e-07	1.59905	3.04e-06	1.02193	3.28945e-07
Saccharophagus_degradans_2-40_NC_007912.fna	5060000	0.458261	6.37e-07	2.04912	2.12e-06	18.1198	3.10865e-07	4390000	0.465378	3.42e-07	3.97626	2.49e-06	153.507	8.60105e-08
Salinibacter_ruber_DSM_13855_NC_007677.fna	3550000	0.662167	5.95e-07	1.76458	1.6e-06	0.515233	3.37191e-07	3020000	0.669874	3.24e-07	2.18981	2.42e-06	0.626277	1.47958e-07
Salmonella_enterica_Choleraesuis_NC_006905.fna	4760000	0.521567	4.62e-07	2.49696	2.47e-06	39.2427	1.85025e-07	3990000	0.532097	2.9e-07	3.24311	3.18e-06	3.30165	8.94203e-08
Salmonella_enterica_Paratypi_ATCC_9150_NC_006511.fna	4590000	0.521644	4.3e-07	2.52866	2.51e-06	41.8436	1.70051e-07	3790000	0.533611	3.22e-07	2.86004	3.26e-06	2.98952	1.12586e-07
Salmonella_typhi_NC_003198.fna	4810000	0.520927	4.76e-07	2.711	2.42e-06	45.3621	1.75581e-07	4000000	0.532505	3.39e-07	3.27572	3.14e-06	2.93804	1.03489e-07
Salmonella_typhi_Ty2_NC_004631.fna	4790000	0.520516	4.74e-07	2.59358	2.43e-06	50.2693	1.82759e-07	3950000	0.532915	3.26e-07	3.41685	3.16e-06	2.92575	9.54095e-08
Salmonella_typhimurium_LT2_NC_003197.fna	4860000	0.522215	4.33e-07	2.66217	2.51e-06	38.5028	1.62649e-07	4200000	0.533455	3.16e-07	3.02549	3.24e-06	2.75545	1.04446e-07
Shewanella_denitrificans_OS217_NC_007954.fna	4550000	0.451492	3.54e-07	2.47769	1.56e-06	7.36571	1.42875e-07	3840000	0.461193	2.34e-07	3.94623	2e-06	8.69193	5.92971e-08
Shewanella_MR-4_NC_008321.fna	4710000	0.478945	4.03e-07	2.14205	1.45e-06	27.4049	1.88138e-07	4040000	0.489649	2.43e-07	3.55702	1.92e-06	290.123	6.83156e-08
Shewanella_oneidensis_NC_004347.fna	4970000	0.459608	4.1e-07	2.01234	1.48e-06	11.6623	2.03743e-07	4150000	0.469305	2.49e-07	3.14222	1.94e-06	11.1774	7.92433e-08
Shigella_boydii_Sb227_NC_007613.fna	4520000	0.512128	3.12e-07	3.64846	2.08e-06	89.2978	8.55155e-08	3640000	0.523258	2.14e-07	5.00474	2.87e-06	0.654793	4.27595e-08
Shigella_dysenteriae_NC_007606.fna	4370000	0.512497	2.87e-07	3.44281	2.06e-06	113.078	8.33621e-08	3380000	0.523316	2.15e-07	4.55229	2.84e-06	0.322155	4.7229e-08
Shigella_flexneri_2a_2457T_NC_004741.fna	4600000	0.509057	3.31e-07	3.39688	2.05e-06	140.403	9.74424e-08	3570000	0.521927	2.33e-07	4.28701	2.85e-06	0.847398	5.43502e-08
Shigella_flexneri_2a_NC_004337.fna	4610000	0.508894	3.26e-07	3.34926	2.05e-06	140.476	9.73349e-08	3690000	0.52002	2.39e-07	4.41516	2.8e-06	1.23834	5.41317e-08
Shigella_flexneri_5_8401_NC_008258.fna	4570000	0.509177	3.29e-07	3.32026	2.06e-06	142.359	9.90886e-08	3700000	0.52024	2.3e-07	4.31984	2.83e-06	1.21319	5.32427e-08
Shigella_sonnei_Ss046_NC_007384.fna	4830000	0.510098	3.36e-07	3.3857	2.06e-06	131.392	9.92409e-08	3890000	0.523153	2.36e-07	4.22183	2.87e-06	0.54475	5.58999e-08
Silicibacter_pomeroyi_DSS-3_NC_003911.fna	4110000	0.642229	4.58e-07	2.65155	3.17e-06	0.567272	1.72729e-07	3690000	0.647877	2.77e-07	3.60837	4.36e-06	0.859879	7.6766e-08
Silicibacter_pomeroyi_DSS-3_NC_006569.fna	491608	0.627883	4.57e-07	2.88117	2.93e-06	0.475579	1.58616e-07	443517	0.633142	2.86e-07	3.29831	3.82e-06	0.686098	8.67111e-08
Silicibacter_TM1040_NC_008043.fna	821785	0.593625	3.2e-07	2.61035	2.12e-06	0.069307	1.22589e-07	717153	0.598499	2.52e-07	3.20175	2.68e-06	0.0893619	7.8707e-08
Silicibacter_TM1040_NC_008044.fna	3200000	0.604129	3.51e-07	2.39893	2.34e-06	0.067521	1.46315e-07	2850000	0.607974	2.53e-07	3.42975	2.89e-06	0.211562	7.37663e-08
Sinorhizobium_meliloti_NC_003047.fna	3650000	0.627289	2.85e-07	3.3533	3.86e-06	0.479051	8.49909e-08	3140000	0.635007	2.13e-07	4.18559	4.81e-06	0.771451	5.08889e-08
Sodalis_glossinidius_morsitans_NC_007712.fna	4170000	0.54699	4.52e-07	2.1675	2.32e-06	4.2481	2.08535e-07	2120000	0.561927	2.99e-07	2.83115	3.09e-06	0.171525	1.05611e-07
Sphingopyxis_alaskensis_RB2256_NC_008048.fna	3350000	0.655015	4.91e-07	3.51631	5.93e-06	0.420543	1.39635e-07	3030000	0.658679	4.22e-07	4.03599	6.97e-06	0.464074	1.04559e-07
Staphylococcus_aureus_aureus_MRSA252_NC_002952.fna	2900000	0.328072	1.02e-06	1.49935	9.79e-07	1.55276	6.80295e-07	2370000	0.335323	3.92e-07	2.58214	1.9e-06	1.19684	1.51812e-07
Staphylococcus_aureus_aureus_MSSA476_NC_002953.fna	2800000	0.328504	1.02e-06	1.46602	9.88e-07	1.54999	6.95761e-07	2290000	0.335276	3.28e-07	2.8117	1.91e-06	1.20693	1.16655e-07
Staphylococcus_aureus_COL_NC_002951.fna	2810000	0.328175	1.08e-06	1.51083	9.88e-07	1.56142	7.14839e-07	2320000	0.335105	3.7e-07	2.86222	1.93e-06	1.22175	1.2927e-07
Staphylococcus_aureus_Mu50_NC_002758.fna	2880000	0.328778	1.05e-06	1.49958	9.71e-07	1.53153	7.00196e-07	2410000	0.335738	3.76e-07	2.84622	1.89e-06	1.21335	1.32105e-07
Staphylococcus_aureus_MW2_NC_003923.fna	2820000	0.328296	1.07e-06	1.487	9.88e-07	1.53588	7.1957e-07	2360000	0.334959	4.14e-07	2.62973	1.92e-06	1.22828	1.57431e-07
Staphylococcus_aureus_N315_NC_002745.fna	2810000	0.328435	1.06e-06	1.51905	9.79e-07	1.50335	6.97805e-07	2350000	0.335595	3.94e-07	2.67109	1.91e-06	1.18203	1.47505e-07
Staphylococcus_aureus_NCTC_8325_NC_007795.fna	2820000	0.328683	1.08e-06	1.48121	9.82e-07	1.50527	7.29134e-07	2400000	0.335117	3.9e-07	2.61102	1.89e-06	1.25897	1.49367e-07
Staphylococcus_aureus_RF122_NC_007622.fna	2740000	0.327787	9.77e-07	1.47255	9.68e-07	1.53958	6.63475e-07	2220000	0.335495	3e-07	2.84798	1.91e-06	1.18877	1.05338e-07
Staphylococcus_aureus_USA300_NC_007793.fna	2870000	0.32751	1.09e-06	1.47288	9.81e-07	1.53368	7.40047e-07	2360000	0.335221	3.98e-07	2.7248	1.93e-06	1.17755	1.46066e-07
Staphylococcus_epidermidis_ATCC_12228_NC_004461.fna	2500000	0.320952	9.26e-07	1.46809	7.78e-07	1.61851	6.30752e-07	2090000	0.329594	4.12e-07	2.10958	1.51e-06	1.18775	1.953e-07
Staphylococcus_epidermidis_RP62A_NC_002976.fna	2620000	0.321514	9.59e-07	1.5023	7.62e-07	1.52646	6.38355e-07	2160000	0.329354	4.21e-07	2.24109	1.51e-06	1.13155	1.87855e-07
Staphylococcus_haemolyticus_NC_007168.fna	2690000	0.327926	9.28e-07	1.69592	7.6e-07	1.26964	5.47196e-07	2310000	0.334175	4.47e-07	3.07959	1.59e-06	0.556917	1.45149e-07
Staphylococcus_saprophyticus_NC_007350.fna	2520000	0.332399	8.98e-07	1.52328	8.81e-07	1.68008	5.89517e-07	2110000	0.340157	3.26e-07	2.45104	1.83e-06	1.00516	1.33005e-07
Streptococcus_agalactiae_2603_NC_004116.fna	2160000	0.356466	7.34e-07	1.90654	1.29e-06	3.37493	3.84991e-07	1870000	0.36057	2.62e-07	3.30956	1.9e-06	2.28083	7.91646e-08
Streptococcus_agalactiae_A909_NC_007432.fna	2130000	0.356224	7.03e-07	1.91371	1.28e-06	3.44304	3.67349e-07	1830000	0.361126	2.46e-07	3.13797	1.87e-06	2.30936	7.83946e-08
Streptococcus_agalactiae_NEM316_NC_004368.fna	2210000	0.356274	7.73e-07	1.90766	1.33e-06	3.38347	4.05208e-07	1940000	0.36076	2.57e-07	3.11024	1.92e-06	2.41405	8.26303e-08
Streptococcus_mutans_NC_004350.fna	2030000	0.36825	6.86e-07	2.11725	2.16e-06	5.01562	3.24005e-07	1740000	0.374625	2.77e-07	2.29453	2.8e-06	3.13961	1.20722e-07
Streptococcus_pneumoniae_R6_NC_003098.fna	2040000	0.39716	7.11e-07	2.0078	1.88e-06	5.04479	3.54119e-07	1770000	0.405302	3.15e-07	2.58214	2.43e-06	2.88948	1.21992e-07
Streptococcus_pneumoniae_TIGR4_NC_003028.fna	2160000	0.396971	7.6e-07	2.36145	1.86e-06	5.06027	3.21836e-07	1800000	0.405453	4.61e-07	4.21803	2.4e-06	2.91277	1.09293e-07
Streptococcus_pyogenes_M1_GAS_NC_002737.fna	1850000	0.385135	6.54e-07	2.27241	1.78e-06	5.78543	2.878e-07	1550000	0.391481	2.97e-07	2.57234	2.41e-06	3.98515	1.15459e-07
Streptococcus_pyogenes_MGAS10270_NC_008022.fna	1930000	0.384299	7.04e-07	2.17185	1.75e-06	5.66969	3.24148e-07	1690000	0.389601	3.24e-07	2.62044	2.35e-06	4.14688	1.23643e-07
Streptococcus_pyogenes_MGAS10394_NC_006086.fna	1900000	0.386851	6.94e-07	2.21782	1.74e-06	5.50183	3.1292e-07	1660000	0.39263	3.08e-07	2.82034	2.32e-06	4.11259	1.09207e-07
Streptococcus_pyogenes_MGAS10750_NC_008024.fna	1940000	0.383159	7.63e-07	2.07759	1.75e-06	5.74503	3.67252e-07	1690000	0.388339	4.35e-07	1.9504	2.33e-06	4.09722	2.23031e-07
Streptococcus_pyogenes_MGAS2096_NC_008023.fna	1860000	0.387292	7.87e-07	2.16427	1.75e-06	5.65802	3.63633e-07	1630000	0.392501	3.46e-07	2.8482	2.33e-06	4.20677	1.2148e-07
Streptococcus_pyogenes_MGAS315_NC_004070.fna	1900000	0.385927	7.05e-07	2.20739	1.76e-06	5.53276	3.19382e-07	1630000	0.391921	3.35e-07	2.53907	2.36e-06	4.22339	1.31938e-07
Streptococcus_pyogenes_MGAS5005_NC_007297.fna	1840000	0.385344	6.61e-07	2.33399	1.77e-06	5.48038	2.83206e-07	1590000	0.391066	3.13e-07	2.69464	2.39e-06	3.87876	1.16157e-07
Streptococcus_pyogenes_MGAS6180_NC_007296.fna	1900000	0.383532	7.38e-07	2.12341	1.77e-06	5.33697	3.47554e-07	1650000	0.389127	3.19e-07	2.58481	2.36e-06	4.03688	1.23413e-07
Streptococcus_pyogenes_MGAS8232_NC_003485.fna	1900000	0.385466	7.16e-07	2.12341	1.76e-06	5.64829	3.37193e-07	1620000	0.391601	3.18e-07	2.58039	2.37e-06	4.22184	1.23237e-07
Streptococcus_pyogenes_MGAS9429_NC_008021.fna	1840000	0.38538	6.88e-07	2.22619	1.77e-06	5.7903	3.09048e-07	1610000	0.390475	3.07e-07	2.67985	2.36e-06	4.06562	1.14559e-07
Streptococcus_pyogenes_SSI-1_NC_004606.fna	1890000	0.385503	7.09e-07	2.16798	1.77e-06	5.98071	3.27033e-07	1610000	0.391701	3.23e-07	2.60118	2.37e-06	4.2182	1.24174e-07
Streptococcus_thermophilus_CNRZ1066_NC_006449.fna	1800000	0.390814	5.99e-07	2.15719	1.47e-06	3.96854	2.77676e-07	1510000	0.398968	2.4e-07	3.37487	2.06e-06	1.45746	7.11139e-08
Streptococcus_thermophilus_LMG_18311_NC_006448.fna	1800000	0.390917	6.07e-07	2.12624	1.46e-06	3.91653	2.8548e-07	1510000	0.399009	2.46e-07	3.34632	2.06e-06	1.41702	7.35136e-08
Streptomyces_avermitilis_NC_003155.fna	9030000	0.707166	4.67e-07	2.69923	2.54e-06	1.12687	1.73012e-07	7790000	0.711422	3.96e-07	2.99016	3.58e-06	1.17418	1.32434e-07
Streptomyces_coelicolor_NC_003888.fna	8670000	0.721187	5.17e-07	2.10636	2.89e-06	1.13386	2.45447e-07	7710000	0.724482	3.78e-07	2.44985	4.07e-06	1.15328	1.54295e-07
Sulfolobus_acidocaldarius_DSM_639_NC_007181.fna	2230000	0.367076	4.33e-07	2.19585	8.84e-07	1.06078	1.9719e-07	1900000	0.374843	4.98e-07	1.96237	9.6e-07	0.62752	2.53775e-07
Sulfolobus_solfataricus_NC_002754.fna	2990000	0.357872	4.12e-07	2.08699	9.24e-07	1.00002	1.97413e-07	2530000	0.364849	4.36e-07	2.14212	9.8e-07	0.718485	2.03537e-07
Sulfolobus_tokodaii_NC_003106.fna	2690000	0.327867	4.12e-07	2.11718	1.04e-06	1.30589	1.94598e-07	2280000	0.335774	4.74e-07	1.95148	1.17e-06	1.01037	2.42893e-07
Symbiobacterium_thermophilum_IAM14863_NC_006177.fna	3570000	0.686684	7.59e-07	2.33302	1.9e-06	1.03142	3.25329e-07	3110000	0.69286	3.52e-07	2.09983	3.25e-06	1.12831	1.67633e-07
Synechococcus_CC9311_NC_008319.fna	2610000	0.524473	6.88e-07	1.44751	2.11e-06	3.37222	4.75299e-07	2270000	0.534356	3.3e-07	1.91776	2.41e-06	1.75073	1.72076e-07
Synechococcus_CC9605_NC_007516.fna	2510000	0.592176	6.19e-07	1.48472	2.51e-06	0.244279	4.16914e-07	2180000	0.60218	3.86e-07	1.78083	3.09e-06	0.64303	2.16753e-07
Synechococcus_CC9902_NC_007513.fna	2230000	0.541645	8.2e-07	1.36772	2.08e-06	1.39955	5.99538e-07	2000000	0.548753	4.75e-07	1.59502	2.37e-06	0.479399	2.97802e-07
Synechococcus_elongatus_PCC_6301_NC_006576.fna	2700000	0.554843	2.24e-07	3.33853	2.47e-06	0.0269088	6.70954e-08	2370000	0.561255	1.92e-07	3.32427	2.89e-06	0.0481575	5.7757e-08
Synechococcus_elongatus_PCC_7942_NC_007604.fna	2700000	0.5547	2.25e-07	3.69561	2.48e-06	0.014215	6.0883e-08	2400000	0.560508	1.92e-07	3.74145	2.91e-06	0.0631871	5.1317e-08
Synechococcus_sp_WH8102_NC_005070.fna	2430000	0.594126	7.26e-07	1.46868	2.59e-06	0.40645	4.94321e-07	2190000	0.602151	5.83e-07	1.59265	3.17e-06	0.80722	3.66057e-07
Synechocystis_PCC6803_NC_000911.fna	3570000	0.477203	2.33e-07	3.45998	2.83e-06	82.6717	6.73414e-08	3110000	0.48588	2.22e-07	3.43062	3.21e-06	134.126	6.47113e-08
Syntrophus_aciditrophicus_SB_NC_007759.fna	3180000	0.5146	5.63e-07	1.87501	2.77e-06	122.345	3.00265e-07	2830000	0.524763	4.37e-07	1.97042	3.06e-06	5.16553	2.2178e-07
Thermoanaerobacter_tengcongensis_NC_003869.fna	2690000	0.375709	1.72e-06	1.28837	2.94e-06	7.69968	1.33502e-06	2340000	0.378032	3.16e-07	2.67853	2.67e-06	31.4926	1.17975e-07
Thermobifida_fusca_YX_NC_007333.fna	3640000	0.675029	4.64e-07	2.12217	1.43e-06	0.835956	2.18644e-07	3100000	0.681338	3.22e-07	2.42935	2.25e-06	1.07235	1.32546e-07
Thermococcus_kodakaraensis_KOD1_NC_006624.fna	2090000	0.519955	3.29e-07	2.63072	2.18e-06	5.27883	1.25061e-07	1920000	0.527601	2.56e-07	3.56791	2.45e-06	0.432248	7.17507e-08
Thermoplasma_acidophilum_NC_002578.fna	1560000	0.459944	3.23e-07	2.39033	1.91e-06	1.80056	1.35128e-07	1370000	0.472777	3.07e-07	2.37625	2.3e-06	0.618614	1.29195e-07
Thermoplasma_volcanium_NC_002689.fna	1580000	0.399185	3.27e-07	2.14943	1.03e-06	2.25563	1.52133e-07	1350000	0.411438	2.09e-07	3.32137	1.2e-06	3.73376	6.29258e-08
Thermosynechococcus_elongatus_NC_004113.fna	2590000	0.539179	1.82e-07	5.68205	1.96e-06	2.69521	3.20307e-08	2330000	0.545403	1.52e-07	6.14439	2.49e-06	4.38215	2.4738e-08
Thermotoga_maritima_NC_000853.fna	1860000	0.462477	4.14e-07	2.1289	4.46e-06	27.7383	1.94467e-07	1760000	0.463916	2.37e-07	3.20388	4.66e-06	11.1251	7.39728e-08
Thermus_thermophilus_HB27_NC_005835.fna	1890000	0.694373	4.75e-07	2.87014	7.09e-06	0.54085	1.65497e-07	1810000	0.696016	2.73e-07	3.19239	8.47e-06	0.54928	8.55159e-08
Thermus_thermophilus_HB27_NC_005838.fna	232602	0.691627	2.82e-07	3.8417	6.97e-06	0.42084	7.3405e-08	206277	0.697649	2.28e-07	7.44235	8.38e-06	0.450398	3.06355e-08
Thermus_thermophilus_HB8_NC_006461.fna	1850000	0.695179	4.19e-07	3.38721	7.13e-06	0.617657	1.23701e-07	1770000	0.6964	2.47e-07	3.55399	8.5e-06	0.564056	6.94994e-08
Thermus_thermophilus_HB8_NC_006462.fna	256989	0.693562	3.28e-07	4.24953	6.76e-06	0.463551	7.7185e-08	229419	0.698621	2.08e-07	4.60825	8.47e-06	0.512986	4.51364e-08
Thiobacillus_denitrificans_ATCC_25259_NC_007404.fna	2910000	0.660672	4.65e-07	2.93171	5.32e-06	0.383363	1.58611e-07	2690000	0.663882	3.67e-07	2.88449	6.33e-06	0.63615	1.27232e-07
Thiomicrospira_crunogena_XCL-2_NC_007520.fna	2430000	0.4313	6.62e-07	1.8071	2.27e-06	13.4763	3.66333e-07	2180000	0.43965	2.84e-07	2.82259	2.78e-06	12.4318	1.00617e-07
Thiomicrospira_denitrificans_ATCC_33889_NC_007575.fna	2200000	0.34462	5.09e-07	1.98876	3.28e-06	6.14377	2.55938e-07	2050000	0.347794	2.45e-07	3.32905	3.68e-06	8.71698	7.35946e-08
Treponema_denticola_ATCC_35405_NC_002967.fna	2840000	0.378738	6.02e-07	1.78771	4.15e-06	14.5345	3.36744e-07	2610000	0.382725	3.54e-07	2.07112	4.39e-06	28.0447	1.70922e-07
Treponema_pallidum_NC_000919.fna	1140000	0.527721	8.68e-07	1.34231	1.94e-06	34.4164	6.46646e-07	1060000	0.52611	2.91e-07	2.18248	2.14e-06	2605.92	1.33335e-07
Trichodesmium_erythraeum_IMS101_NC_008312.fna	7750000	0.341434	4.6e-07	2.38365	1.61e-06	3.95737	1.92981e-07	4640000	0.367694	3.82e-07	3.04317	2.01e-06	3.2628	1.25527e-07
Tropheryma_whipplei_TW08_27_NC_004551.fna	925935	0.46314	6.46e-07	2.63108	1.1e-06	13.2101	2.45527e-07	783081	0.464061	2.14e-07	3.43462	1.34e-06	8.70052	6.23067e-08
Tropheryma_whipplei_Twist_NC_004572.fna	927300	0.46332	6.83e-07	2.6093	1.1e-06	24.6848	2.61756e-07	798879	0.464568	1.95e-07	4.07788	1.34e-06	8.47008	4.7819e-08
Ureaplasma_urealyticum_NC_002162.fna	751716	0.254997	6.38e-07	1.79075	3.33e-06	2.64547	3.56275e-07	686556	0.257085	3.61e-07	2.00066	4.37e-06	2.38273	1.8044e-07
Vibrio_cholerae_NC_002505.fna	2960000	0.476948	4.42e-07	2.06197	1.74e-06	26.8758	2.14358e-07	2600000	0.482898	3.26e-07	2.4122	2.31e-06	30.88	1.35146e-07
Vibrio_cholerae_NC_002506.fna	1070000	0.469135	5.34e-07	2.23869	1.81e-06	18.4895	2.38532e-07	909780	0.475433	3.65e-07	2.03384	2.22e-06	16.292	1.79463e-07
Vibrio_fischeri_ES114_NC_006840.fna	2910000	0.389624	4.7e-07	2.14673	1.25e-06	2.7161	2.18938e-07	2510000	0.395356	2.56e-07	3.67493	1.96e-06	0.917344	6.96612e-08
Vibrio_fischeri_ES114_NC_006841.fna	1330000	0.370249	4.76e-07	1.83724	1.14e-06	2.65501	2.59084e-07	1160000	0.378992	2.71e-07	2.64245	1.68e-06	1.37561	1.02556e-07
Vibrio_parahaemolyticus_NC_004603.fna	3290000	0.453856	3.94e-07	2.42745	1.51e-06	7.08705	1.6231e-07	2860000	0.462115	2.64e-07	3.61334	2.07e-06	3.87026	7.30626e-08
Vibrio_parahaemolyticus_NC_004605.fna	1880000	0.453515	3.88e-07	2.17171	1.67e-06	8.90839	1.78661e-07	1630000	0.464009	2.88e-07	2.90199	2.16e-06	12.1218	9.92422e-08
Vibrio_vulnificus_CMCP6_NC_004459.fna	3280000	0.464499	5.2e-07	2.10608	1.72e-06	14.2851	2.46904e-07	2760000	0.475657	2.67e-07	3.09993	2.26e-06	19.3929	8.6131e-08
Vibrio_vulnificus_CMCP6_NC_004460.fna	1840000	0.471192	3.67e-07	2.2648	1.96e-06	23.1771	1.62045e-07	1590000	0.48333	2.49e-07	3.11645	2.45e-06	699.166	7.98986e-08
Vibrio_vulnificus_YJ016_NC_005139.fna	3350000	0.464113	5.15e-07	2.12132	1.7e-06	15.4976	2.42773e-07	2970000	0.471508	3.23e-07	2.54425	2.2e-06	15.1296	1.26953e-07
Vibrio_vulnificus_YJ016_NC_005140.fna	1860000	0.472141	3.51e-07	2.32601	1.97e-06	20.6904	1.50902e-07	1680000	0.481016	2.37e-07	3.26517	2.43e-06	122.94	7.25843e-08
Wigglesworthia_brevipalpis_NC_004344.fna	697721	0.224789	7.73e-07	1.41958	4.48e-06	3.97454	5.44527e-07	606846	0.236454	2.64e-07	2.53674	4.43e-06	4.26285	1.04071e-07
Wolbachia_endosymbiont_of_Brugia_malayi_TRS_NC_006833.fna	1080000	0.341791	2.6e-07	1.91672	1.22e-06	3.33157	1.35648e-07	724053	0.352136	1.46e-07	4.10081	1.36e-06	3.53193	3.56027e-08
Wolbachia_endosymbiont_of_Drosophila_melanogaster_NC_002978.fna	1270000	0.352348	3.16e-07	1.99579	1.4e-06	3.76683	1.58333e-07	1020000	0.354639	1.86e-07	3.28394	1.56e-06	4.75846	5.66393e-08
Wolinella_succinogenes_NC_005090.fna	2110000	0.48458	5.59e-07	1.92126	4.61e-06	201.45	2.90955e-07	1980000	0.489064	2.67e-07	2.85394	4.96e-06	38823.9	9.35549e-08
Xanthomonas_campestris_8004_NC_007086.fna	5150000	0.64957	5.44e-07	2.64157	4.48e-06	0.720034	2.05938e-07	4370000	0.65476	4.04e-07	3.04543	5.59e-06	0.907417	1.32658e-07
Xanthomonas_campestris_NC_003902.fna	5080000	0.650684	4.84e-07	2.76369	4.56e-06	0.718964	1.75128e-07	4310000	0.655943	3.65e-07	3.11155	5.68e-06	0.921837	1.17305e-07
Xanthomonas_campestris_vesicatoria_85-10_NC_007508.fna	5180000	0.647483	4.49e-07	3.15693	4.51e-06	0.720922	1.42227e-07	4530000	0.6509	3.5e-07	3.77926	5.43e-06	0.865396	9.26107e-08
Xanthomonas_citri_NC_003919.fna	5180000	0.647719	4.54e-07	3.02136	4.53e-06	0.724667	1.50263e-07	4460000	0.651202	3.52e-07	3.74227	5.45e-06	0.90694	9.40606e-08
Xanthomonas_oryzae_KACC10331_NC_006834.fna	4940000	0.636933	3.63e-07	3.68743	4.17e-06	0.623819	9.84425e-08	3970000	0.64251	2.79e-07	4.66933	5.1e-06	0.87226	5.97516e-08
Xanthomonas_oryzae_MAFF_311018_NC_007705.fna	4940000	0.637013	3.78e-07	3.72493	4.18e-06	0.621703	1.01478e-07	4160000	0.642166	3.04e-07	5.09639	5.12e-06	0.837765	5.96501e-08
Xylella_fastidiosa_NC_002488.fna	2680000	0.526741	1.49e-06	1.33747	1.49e-06	140.563	1.11404e-06	2230000	0.537868	7.52e-07	1.66429	1.83e-06	0.0453716	4.51844e-07
Xylella_fastidiosa_Temecula1_NC_004556.fna	2520000	0.517764	1.68e-06	1.30425	1.5e-06	9.82421	1.2881e-06	1970000	0.531595	5.44e-07	1.75762	1.86e-06	0.526939	3.09509e-07
Yersinia_pestis_Antiqua_NC_008150.fna	4700000	0.477012	3.61e-07	2.32567	1.52e-06	31.4508	1.55224e-07	3950000	0.489346	2.56e-07	3.33965	2.03e-06	14.861	7.66547e-08
Yersinia_pestis_biovar_Mediaevails_NC_005810.fna	4600000	0.476501	3.95e-07	2.28235	1.54e-06	29.8411	1.73067e-07	3750000	0.488514	2.51e-07	3.36731	2.04e-06	11.9901	7.45402e-08
Yersinia_pestis_CO92_NC_003143.fna	4650000	0.476361	3.9e-07	2.22361	1.53e-06	30.743	1.7539e-07	3730000	0.489052	2.74e-07	3.08871	2.04e-06	12.5557	8.87102e-08
Yersinia_pestis_KIM_NC_004088.fna	4600000	0.476412	3.95e-07	2.23886	1.53e-06	26.1817	1.76429e-07	3830000	0.488617	2.59e-07	3.3281	2.03e-06	12.2671	7.78222e-08
Yersinia_pestis_Nepal516_NC_008149.fna	4530000	0.47584	3.86e-07	2.23682	1.53e-06	31.5923	1.72566e-07	3800000	0.488128	2.52e-07	3.37593	2.04e-06	12.1508	7.46461e-08
Yersinia_pseudotuberculosis_IP32953_NC_006155.fna	4740000	0.476104	4.18e-07	2.31077	1.57e-06	28.6557	1.80892e-07	3920000	0.488954	2.83e-07	3.37906	2.09e-06	13.1431	8.37511e-08
Zymomonas_mobilis_ZM4_NC_006526.fna	2060000	0.463283	3.68e-07	2.56132	3.05e-06	36.0484	1.43676e-07	1770000	0.475707	2.28e-07	3.95049	3.38e-06	17.8408	5.77144e-08

## Sheet: Labels explained
Name				Name of organism
Size				Genome size in nucleotides
GC				GC content
OUD				The OUD measure
OUD_O/OUD_E				Ratio of observed divided by expected OUD scores
OUV				The OUV measure
OUV_O/OUV_E				Ratio of observed divided by expected OUV scores
GC content variance				Variance of GC content within genomes
Size ORFS				Size of genomic concatenated open reading frames
GC ORFS				GC content in concatenated open reading frames
OUD ORFS				The OUD measure used on concatenated open reading frames
OUD_O/OUD_E ORFS				Ratio of observed divided by expected OUD scores on concatenated open reading frames
OUV ORFS				The OUV measure used on concatenated open reading frames
OUV_O/OUV_E ORFS				Ratio of observed divided by expected OUV scores on concatenated open reading frames
GC content variance ORFS				Variance of GC content within concatenated open reading frames
